# Supplementary material
Source: PubMed Central journal article supplement (PMC7258684)
Supplement: NIHMS1590877-supplement-Figures_1-14.pdf [file NIHMS1590877-supplement-Figures_1-14.pdf]

In the format provided by the authors and unedited.

# Single-cell multiomic analysis identifies regulatory programs in mixed-phenotype acute leukemia

Jeffrey M. Granja<sup>1,2,3,13</sup>, Sandy Klemm<sup>3,13\*</sup>, Lisa M. McGinnis<sup>3,4,13\*</sup>, Arwa S. Kathiria<sup>3</sup>, Anja Mezger<sup>3,5</sup>, M. Ryan Corces<sup>1,4</sup>, Benjamin Parks<sup>3,6</sup>, Eric Gars<sup>4</sup>, Michaela Liedtke<sup>7</sup>, Grace X. Y. Zheng<sup>8</sup>, Howard Y. Chang<sup>1,3,9,10</sup>, Ravindra Majeti<sup>7</sup> and William J. Greenleaf<sup>1,3,11,12\*</sup>

<sup>1</sup>Center for Personal Dynamic Regulomes, Stanford University School of Medicine, Stanford, CA, USA. <sup>2</sup>Biophysics Program, Stanford University School of Medicine, Stanford, CA, USA. <sup>3</sup>Department of Genetics, Stanford University School of Medicine, Stanford, CA, USA. <sup>4</sup>Department of Pathology, Stanford University School of Medicine, Stanford, CA, USA. <sup>5</sup>Department of Medical Biochemistry and Biophysics, Karolinska Institute, Stockholm, Sweden. <sup>6</sup>Department of Computer Science, Stanford University School of Engineering, Stanford, CA, USA. <sup>7</sup>Department of Medicine, Division of Hematology, Stanford Cancer Institute, Stanford University School of Medicine, Stanford, CA, USA. <sup>8</sup>10x Genomics, Pleasanton, CA, USA. <sup>9</sup>Department of Dermatology, Stanford University School of Medicine, Redwood City, CA, USA. <sup>10</sup>Howard Hughes Medical Institute, Stanford University School of Medicine, Stanford, CA, USA. <sup>11</sup>Department of Applied Physics, Stanford University, Stanford, CA, USA. <sup>12</sup>Chan-Zuckerberg Biohub, San Francisco, CA, USA. <sup>13</sup>These authors contributed equally: Jeffrey M. Granja, Sandy Klemm, Lisa M. McGinnis. \*e-mail: [klemm@stanford.edu](mailto:klemm@stanford.edu); [lisa.mcginnis@stanford.edu](mailto:lisa.mcginnis@stanford.edu); [wjg@stanford.edu](mailto:wjg@stanford.edu)

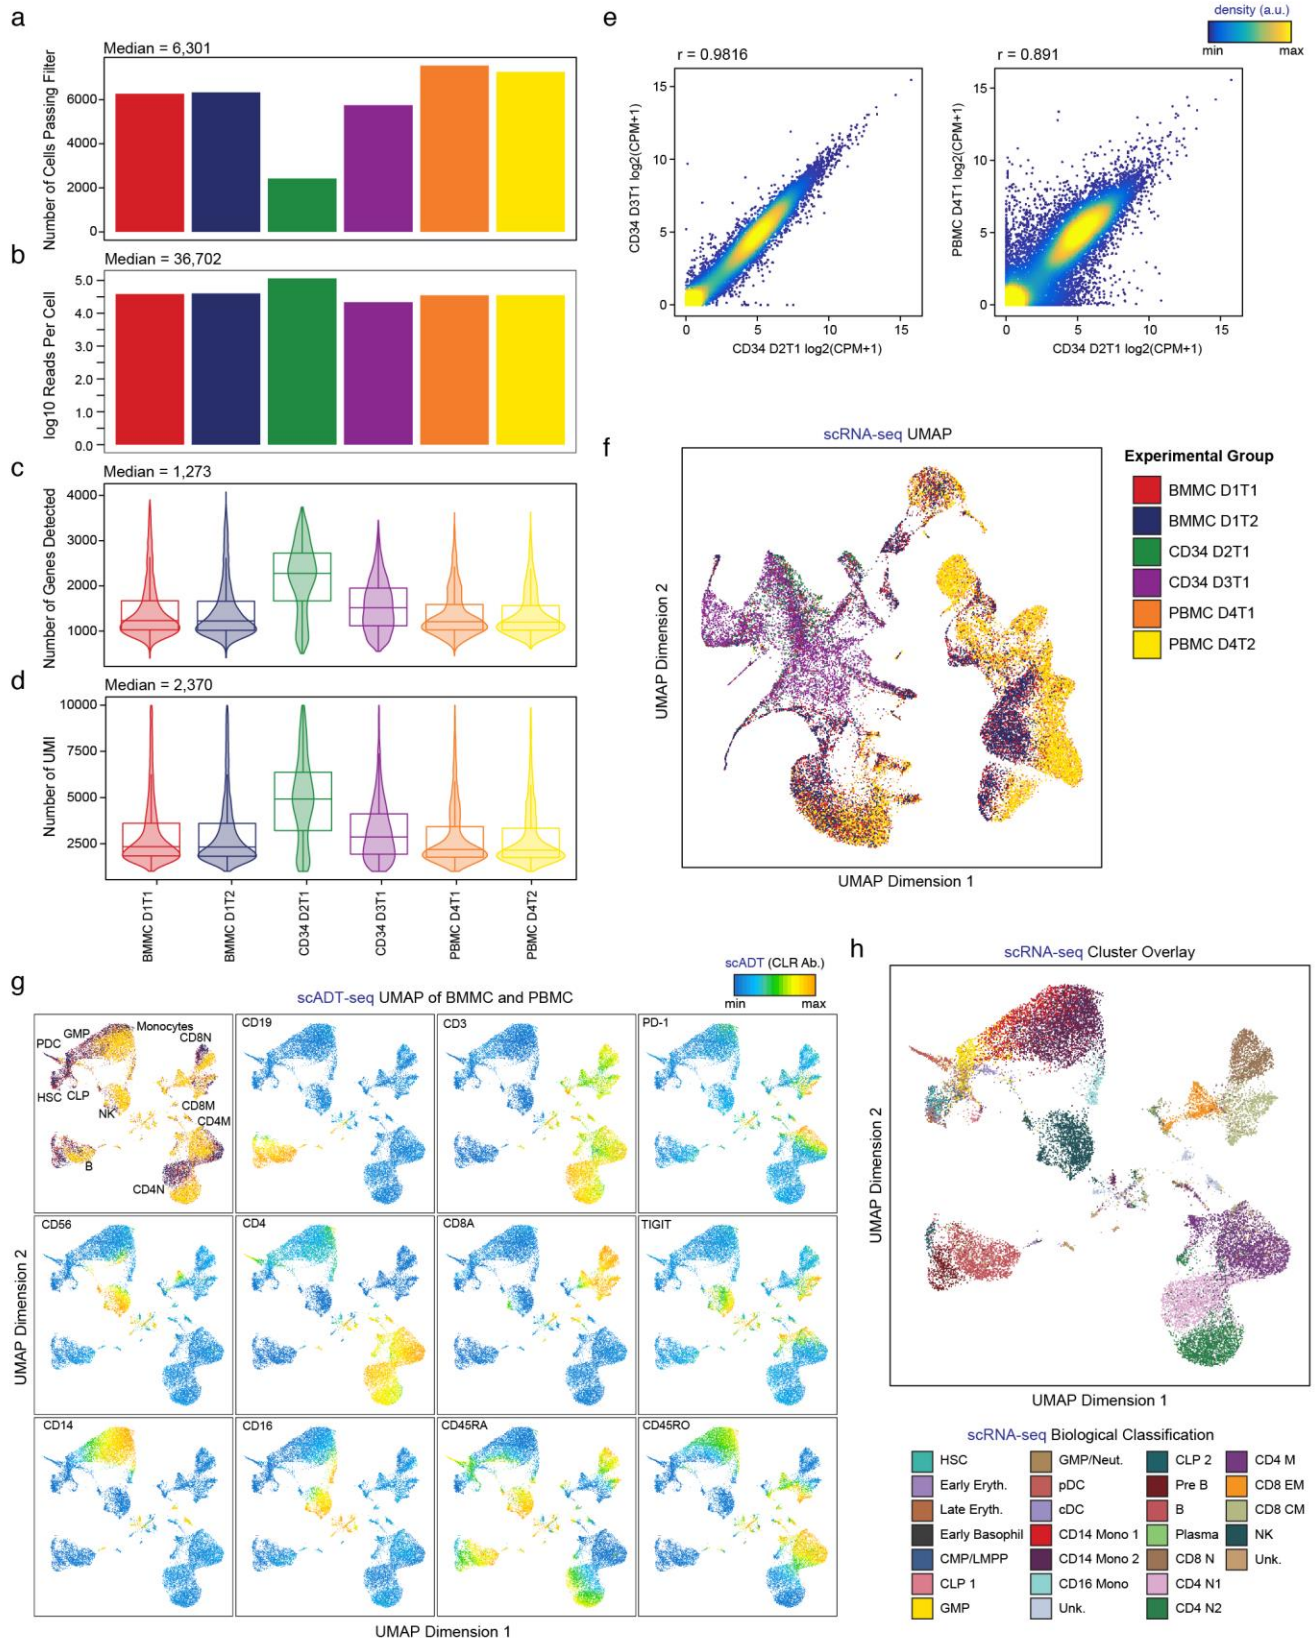

Supplementary Figure 1

Quality control of CITE-seq data for hematopoiesis samples.

**(a)** Number of cells passing filter for each experimental replicate (number of informative genes > 400 and number of unique molecular identifiers (UMI) > 1000). **(b)** Number of aligned reads on average per cell passing filter for each experimental sample. **(c)** Violin and box-whisker plot of the number of informative genes detected per single cell passing filter per experimental sample (n = 2,424 – 7,544). **(d)** Violin and box-whisker plot of the number of unique molecular identified (UMI) transcripts per cell passing filter per experimental sample (n = 2,424 – 7,544). **(e)** Aggregated scRNA-seq (n = 20,287) one to one reproducibility plots for biological replicates (left) and across sample types (right) colored by the density. The correlation (r) represents the Pearson correlation across all genes. **(f)** scRNA-seq experimental sample labels overlay on UMAP of hematopoiesis (n = 35,582). **(g)** scADT-seq UMAP of BMMC and PBMC samples (n = 4) across 14 antibodies. scADT overlay of experimental sample labels, CD19, CD3, CD56, CD4, CD8A, CD14, CD16, CD45RA, CD45RO, TIGIT and PD-1 respectively. Color represents experimental labels or scADT-seq values after CLR transformation. **(h)** scADT-seq UMAP of BMMC and PBMC samples (n = 4) across 14 antibodies colored by scRNA-seq clusters with biological classification. Box-whisker plot; lower whisker is the lowest value greater than the 25% quantile minus 1.5 times the interquartile range (IQR), the lower hinge is the 25% quantile, the middle is the median, the upper hinge is the 75% quantile and the upper whisker is the largest value less than the 75% quantile plus 1.5 times the IQR.

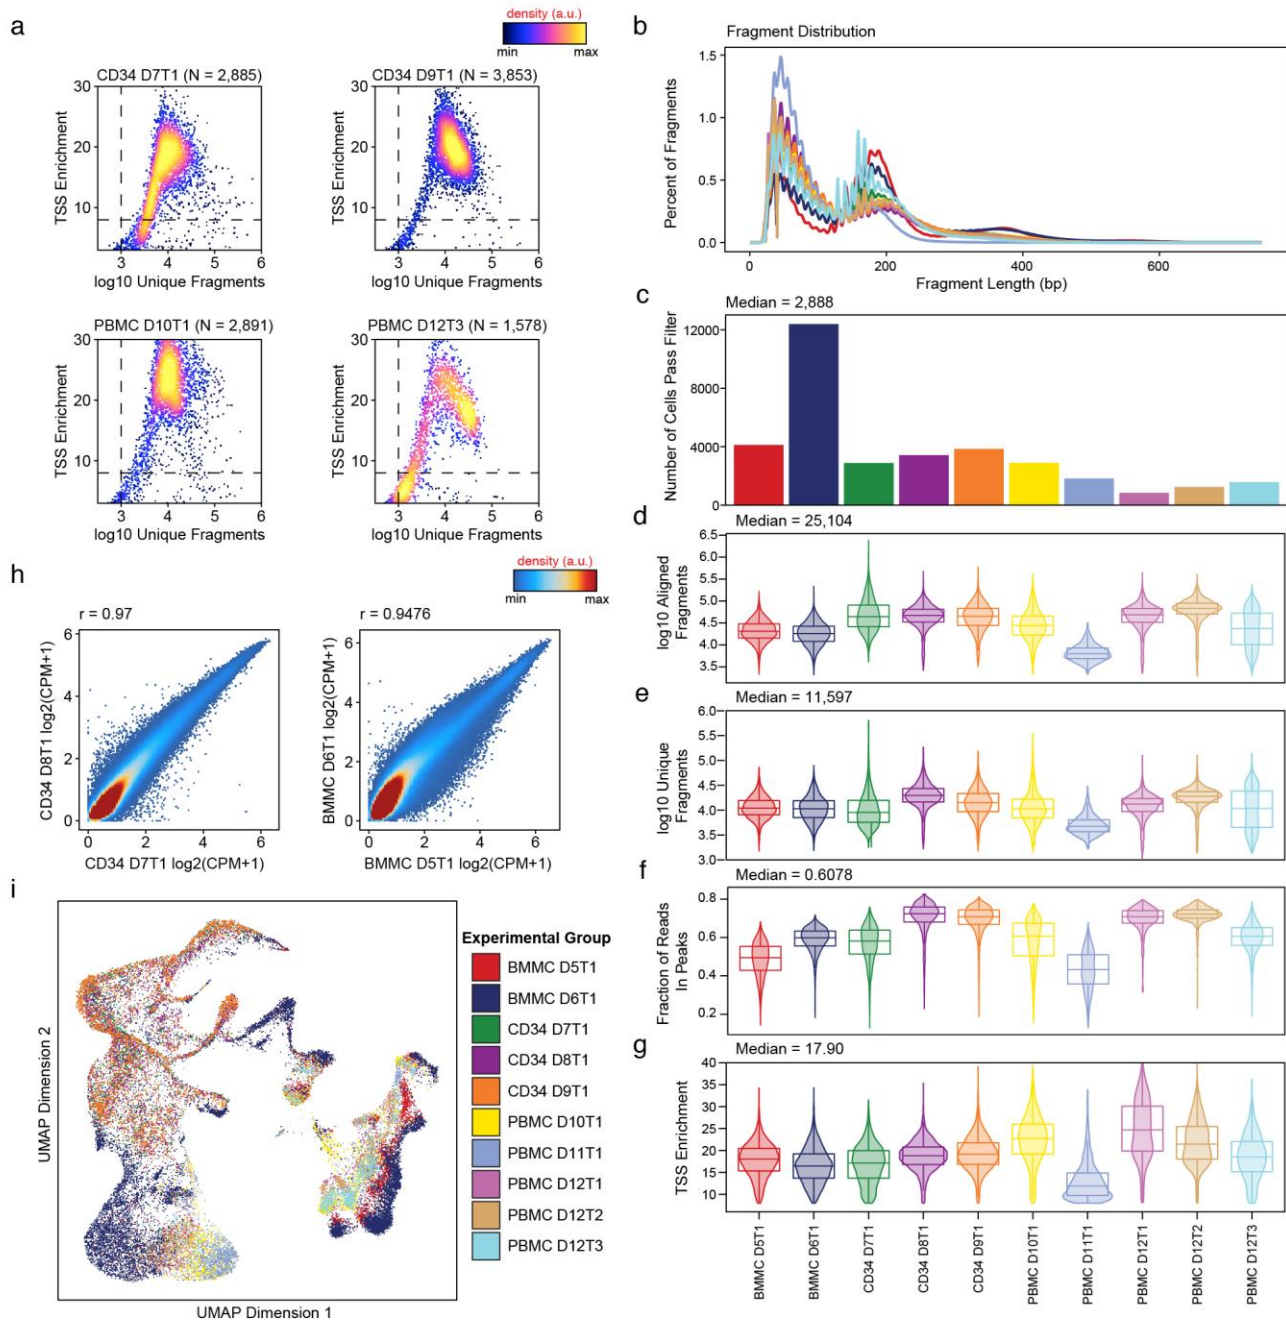

## Supplementary Figure 2

Quality control of scATAC-seq data for hematopoiesis samples.

**(a)** scATAC-seq cell filtering plot of 4 representative scATAC-seq hematopoietic samples. The x-axis is the number of unique accessible fragments and the y-axis is the enrichment of Tn5 insertions at transcription start sites, representing the robust signal to background for each single cell. **(b)** Aggregated scATAC-seq fragment size distributions across individual experiments demonstrating sub-, mono- and multi nucleosome spanning ATAC-seq fragments. **(c)** Number of cells passing filter for each experimental replicate (Unique nuclear fragments > 1000 and TSS enrichment > 8). **(d)** Violin and box-whisker plot of the number of total aligned fragments for each single cell passing filter per experimental sample ( $n = 836 - 12,394$ ). **(e)** Violin and box-whisker plot of the number of unique aligned nuclear fragments for each single cell passing filter per experimental sample ( $n = 836 - 12,394$ ). **(f)** Violin and box-whisker plot of the fraction of the total number Tn5 insertions (Reads) that are within the healthy hematopoietic union peak set ( $n = 452,004$ ) for each single cell passing filter. **(g)** Violin and box-whisker plot of the normalized transcription start site (TSS) enrichment for each single cell passing filter per experimental sample. **(h)** Aggregated scATAC-seq ( $n = 452,004$ ) one to one reproducibility plots for biological

replicates colored by the density. The correlation ( $r$ ) represents the Pearson correlation across all genes. **(i)** scATAC-seq experimental sample labels overlay on UMAP of hematopoiesis ( $n = 35,038$ ). Box-whisker plot; lower whisker is the lowest value greater than the 25% quantile minus 1.5 times the interquartile range (IQR), the lower hinge is the 25% quantile, the middle is the median, the upper hinge is the 75% quantile and the upper whisker is the largest value less than the 75% quantile plus 1.5 times the IQR.

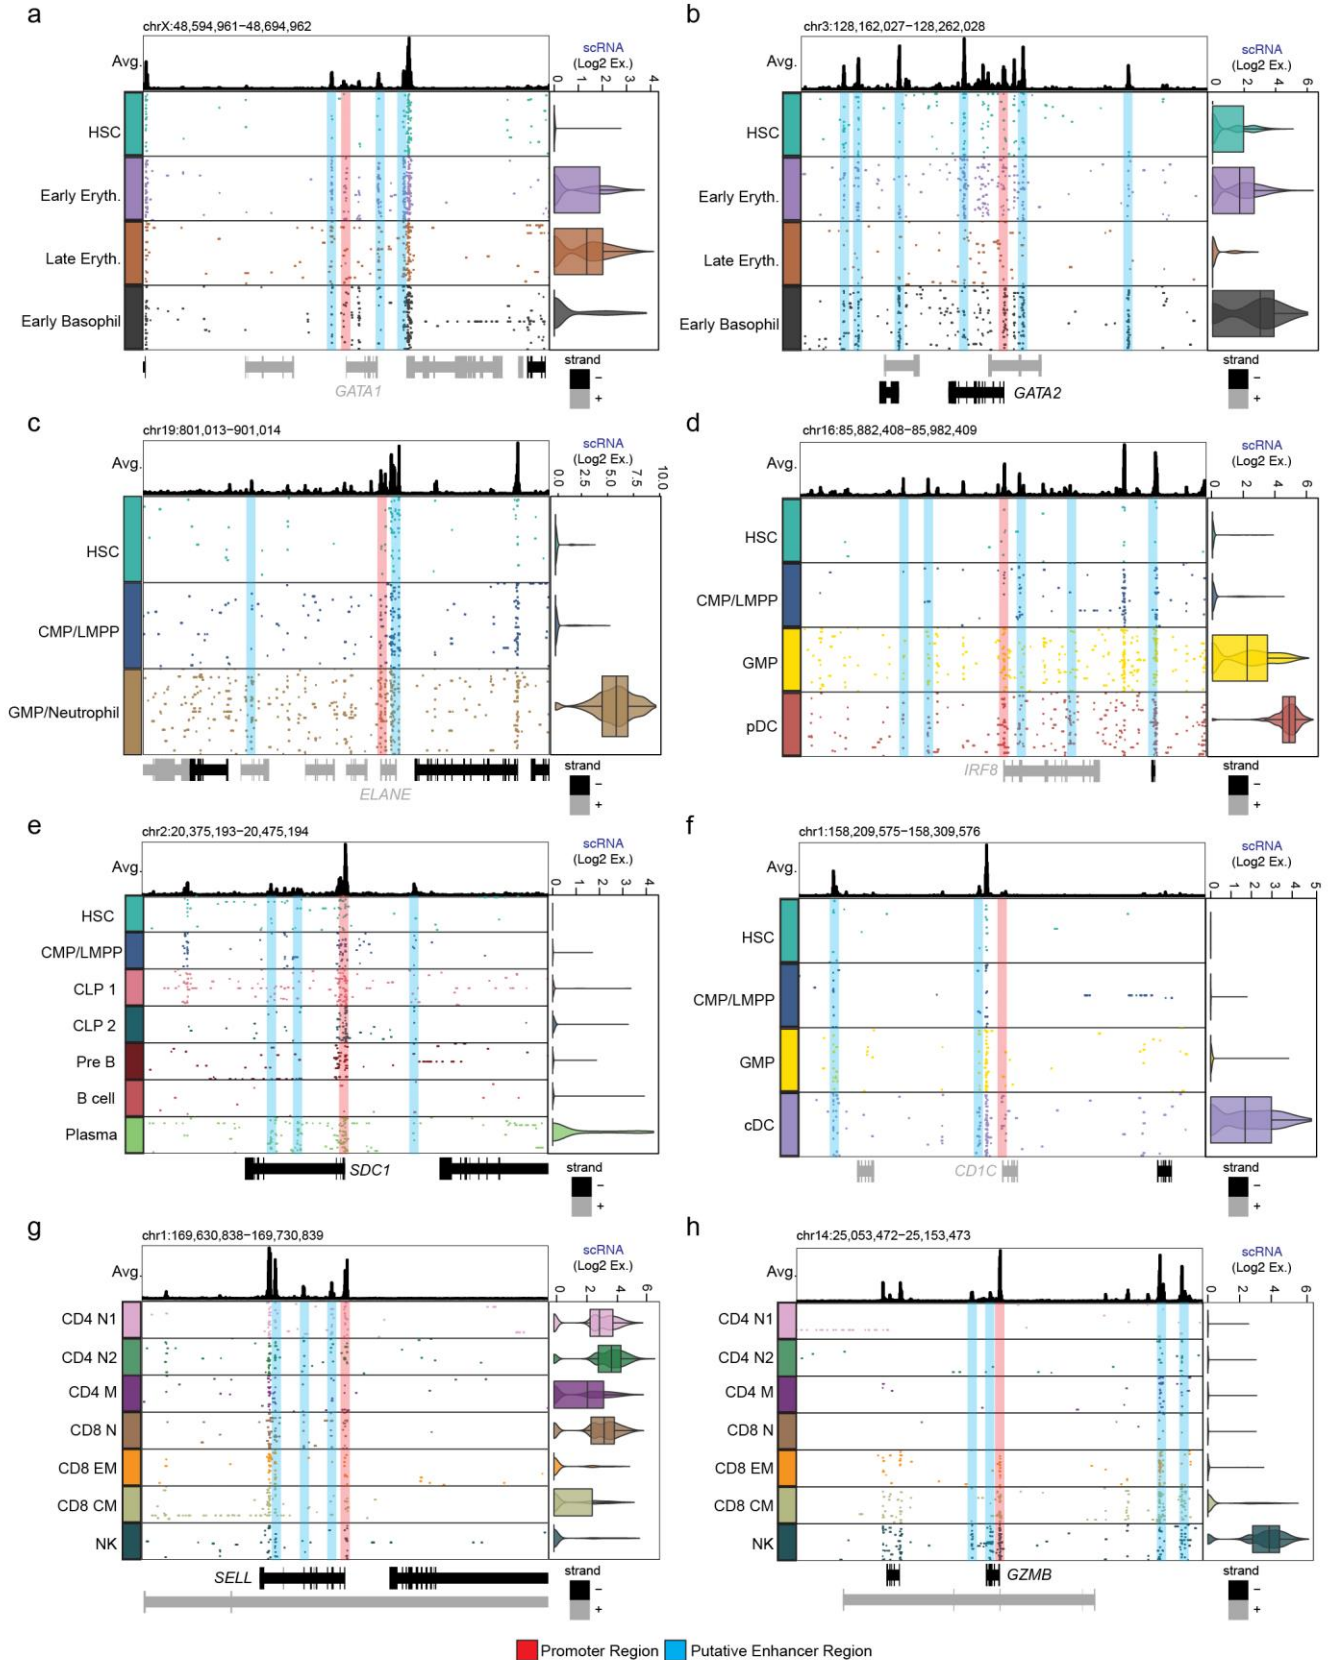

### Supplementary Figure 3

Validation of key marker genes for both scRNA-seq and scATAC-seq for hematopoiesis.

**(a-h)** Multi-omic tracks; (Top) average track of all clusters displayed, (Middle) binarized 100 random scATAC-seq tracks for each locus at 100bp resolution and (right) violin and box-whisker plot of the scRNA-seq log<sub>2</sub> normalized expression for each cluster. Box-whisker plot; lower whisker is the lowest value greater than the 25% quantile minus 1.5 times the interquartile range (IQR), the lower hinge is the 25% quantile, the middle is the median, the upper hinge is the 75% quantile and the upper whisker is the largest value less than the 75% quantile plus 1.5 times the IQR. **(a)** Multi-omic track of *GATA1* (specific in these clusters for Erythroid) for erythroid development from HSC progenitor cells (n = 111 - 1,653). **(b)** Multi-omic track of *GATA2* (specific in these clusters for Basophil) for erythroid development from HSC progenitor cells (n = 111 - 1,653). **(c)** Multi-omic track of *ELANE* (specific in these clusters for GMP/Neutrophil) for neutrophil development from HSC progenitor cells (n = 1,050 - 2,260). **(d)** Multi-omic track of *IRF8* (specific in these clusters for pDC) across pDC development from HSC progenitor cells (n = 544 - 2,260). **(e)** Multi-omic track of *SDC1* (specific in these clusters for Plasma cells) across B cell development and plasma cells (n = 62 - 2,260). **(f)** Multi-omic track of *CD1C* (specific in these clusters for cDC) across cDC development from HSC progenitor cells (n = 325 - 2,260). **(g)** Multi-omic track of *SELL* (specific in these clusters for Naive T cells vs memory, and CD8 central memory vs CD8 effector memory) across NK and T cells (n = 796 - 3,539). **(h)** Multi-omic track of *GZMB* (specific in these clusters for NK cells) across NK and T cells (n = 796 - 3,539).





## Supplementary Figure 4

Diagnostic flow cytometry plots for MPALs 1-5R.

**(a-f)** Diagnostic flow cytometry plots from the 5 different MPAL cases (MPAL1-5R) gated on blasts area (highlighted in red) and lymphocytes (highlighted in black) from CD45 and side scatter area (SSC-A). **(a)** MPAL 1 shows classic bilineal phenotype with both T-lymphoblasts (cCD3-positive and CD7-positive) and myeloid blasts (MPO-positive and CD33-positive). **(b)** MPAL 2 demonstrates a more complex phenotype with both biphenotypic (single population expressing lymphoid marker CD7 and myeloid marker CD33) and bilineal T-Myeloid patterns (subpopulation expressing monocytic markers CD64, CD33, and CD14). **(c)** MPAL 3 demonstrates a classic biphenotypic case with coexpression of both T-lineage markers (cCD3-positive) and myeloid markers (MPO-positive). **(d)** MPAL4 demonstrates a classic bilineal B/M phenotype expressing B-lineage markers (CD79a and CD19-positive) and myeloid markers (MPO-positive and CD33-positive). **(e)** MPAL5 demonstrates a more complicated phenotype with a subpopulation of blasts expressing T-lineage markers (cCD3-positive and CD7-positive) and a subpopulation expressing myeloid marker MPO. **(f)** MPAL5R post-treatment relapse of MPAL5. Flow cytometry reveals expansion of the T-lymphoblastic subpopulation (cCD3-positive, TdT-positive population) following chemotherapy. **(g)** High-confidence mutations detected in 5 MPAL cases by whole exome sequencing. Missense mutations are shown in blue, frameshift deletions are shown in yellow, stop-gain mutations are shown in purple, frameshift insertions are shown in orange, and nonframeshift deletions are shown in dark gray.

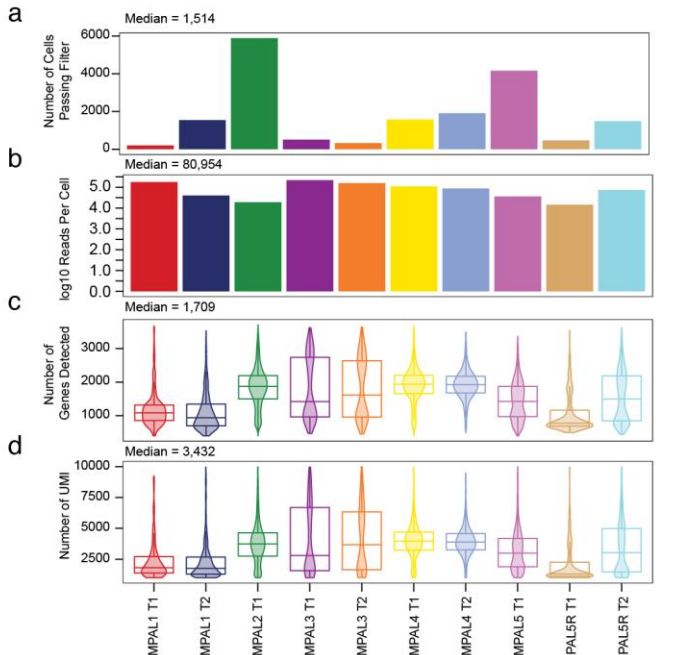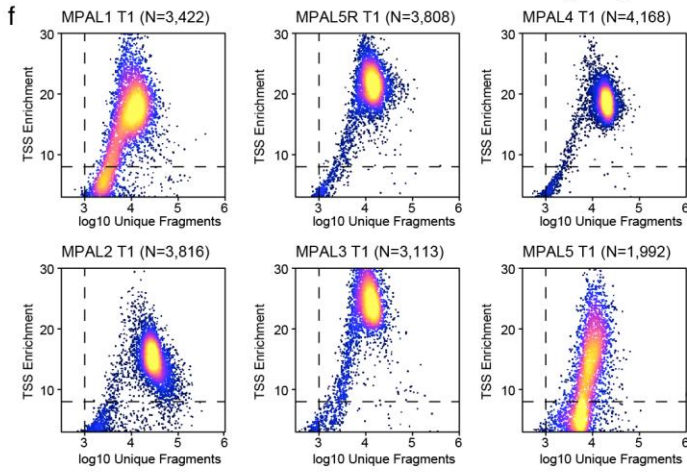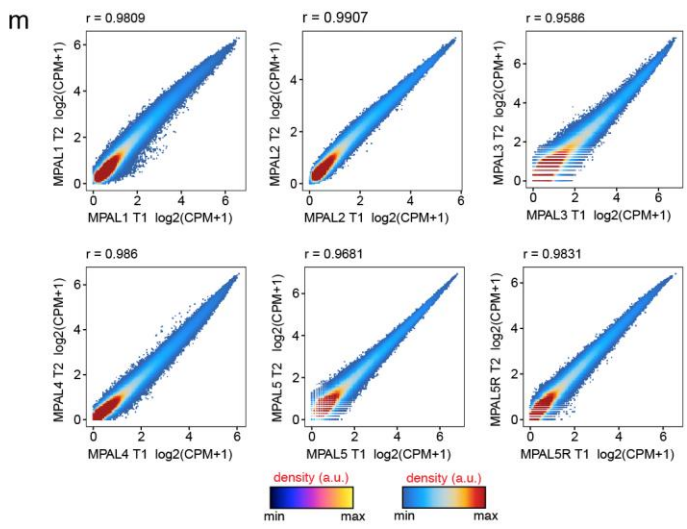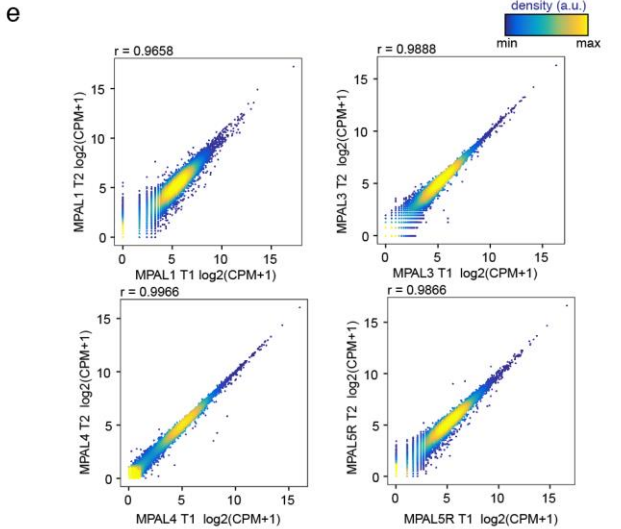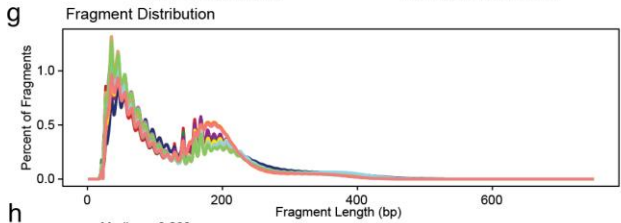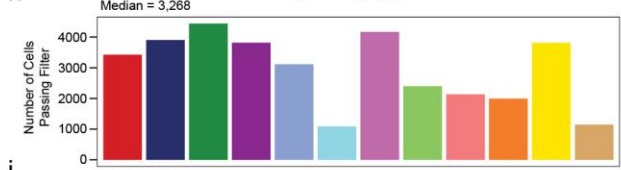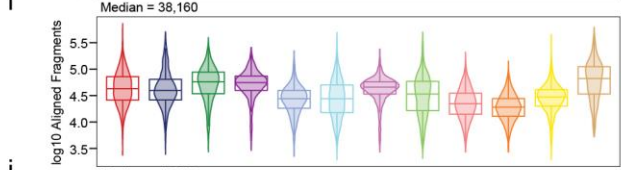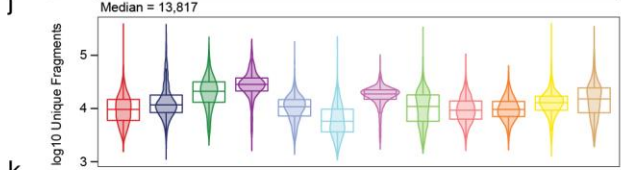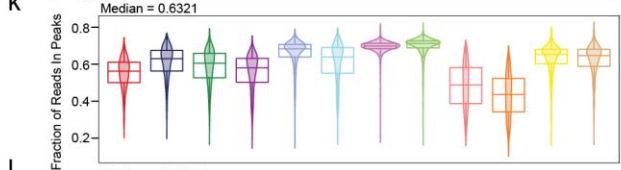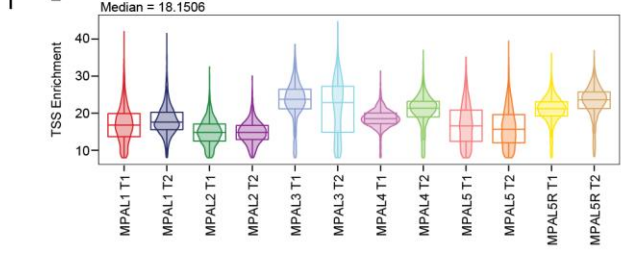

## Supplementary Figure 5

Quality control of scRNA-seq and scATAC-seq data for MPAL samples.

**(a)** Number of cells passing filter for each experimental replicate (number of informative genes > 400 and number of unique molecular identifiers (UMI) > 1000). **(b)** Number of aligned reads on average per cell passing filter for each experimental sample. **(c)** Violin and box-whisker plot of the number of informative genes detected per single cell passing filter per experimental sample. **(d)** Violin and box-whisker plot of the number of unique molecular identified (UMI) transcripts per cell passing filter per experimental sample. **(e)** Aggregated scRNA-seq ( $n = 20,287$ ) one to one reproducibility plots for technical replicates colored by the density. The correlation ( $r$ ) represents the Pearson correlation across all genes. **(f)** scATAC-seq cell filtering plot of 6 representative scATAC-seq MPAL samples. The x-axis is the number of unique accessible fragments and the y-axis is the enrichment of Tn5 insertions at transcription start sites, representing the robust signal to background for each single cell. **(g)** Aggregated scATAC-seq fragment size distributions across individual experiments demonstrating sub-, mono- and multi nucleosome spanning ATAC-seq fragments. **(h)** Number of cells passing filter for each experimental replicate (Unique nuclear fragments > 1000 and TSS enrichment > 8). **(i)** Violin and box-whisker plot of the number of total aligned fragments for each single cell passing filter per experimental sample. **(j)** Violin and box-whisker plot of the number of unique aligned nuclear fragments for each single cell passing filter per experimental sample. **(k)** Violin and box-whisker plot of the fraction of the total number Tn5 insertions (Reads) that are within the MPAL union peak set ( $n = 346,274$ ) for each single cell passing filter. **(l)** Violin and box-whisker plot of the normalized transcription start site (TSS) enrichment for each single cell passing filter per experimental sample. **(m)** Aggregated scATAC-seq ( $n = 346,274$ ) one to one reproducibility plots for technical replicates colored by the density. The correlation ( $r$ ) represents the Pearson correlation across all genes. Box-whisker plot; lower whisker is the lowest value greater than the 25% quantile minus 1.5 times the interquartile range (IQR), the lower hinge is the 25% quantile, the middle is the median, the upper hinge is the 75% quantile and the upper whisker is the largest value less than the 75% quantile plus 1.5 times the IQR.

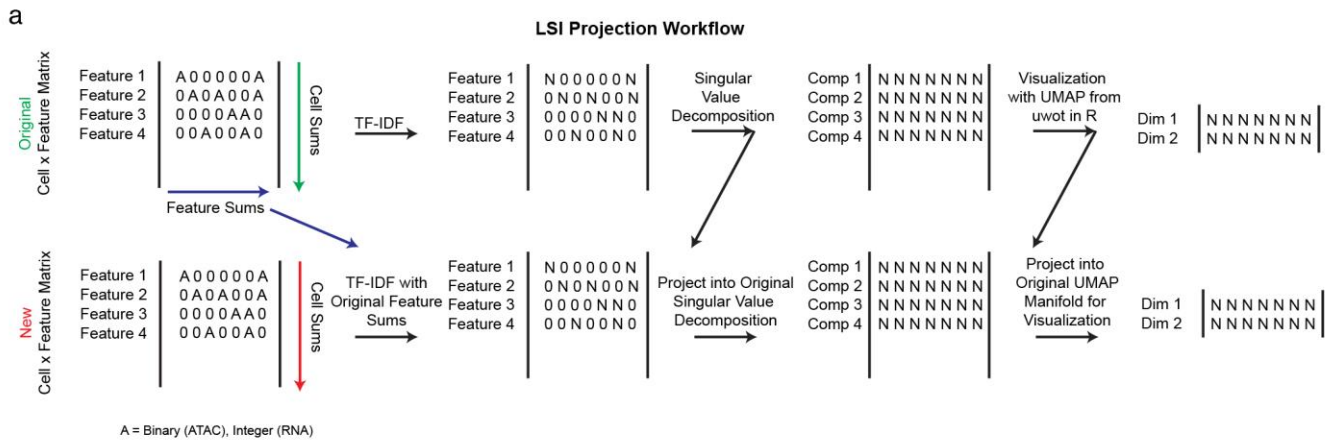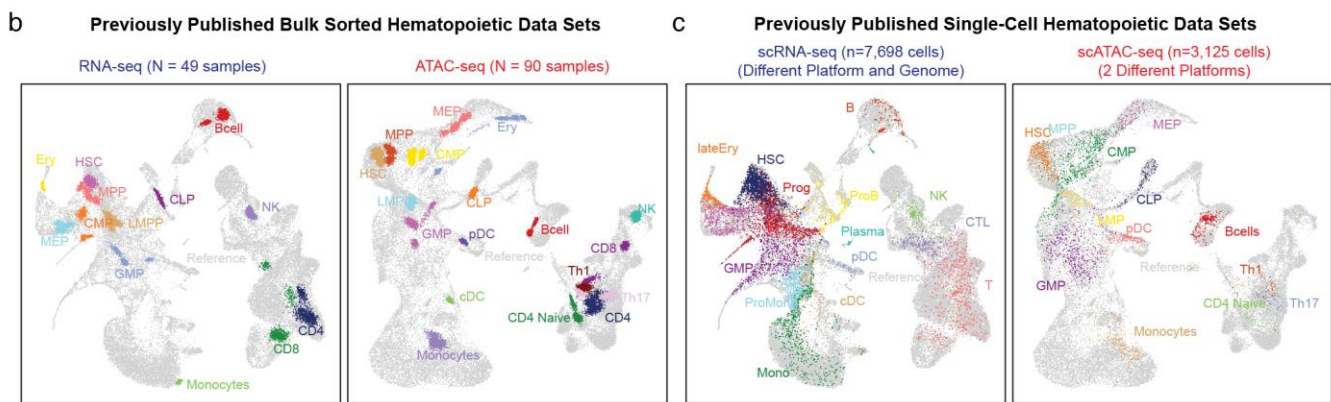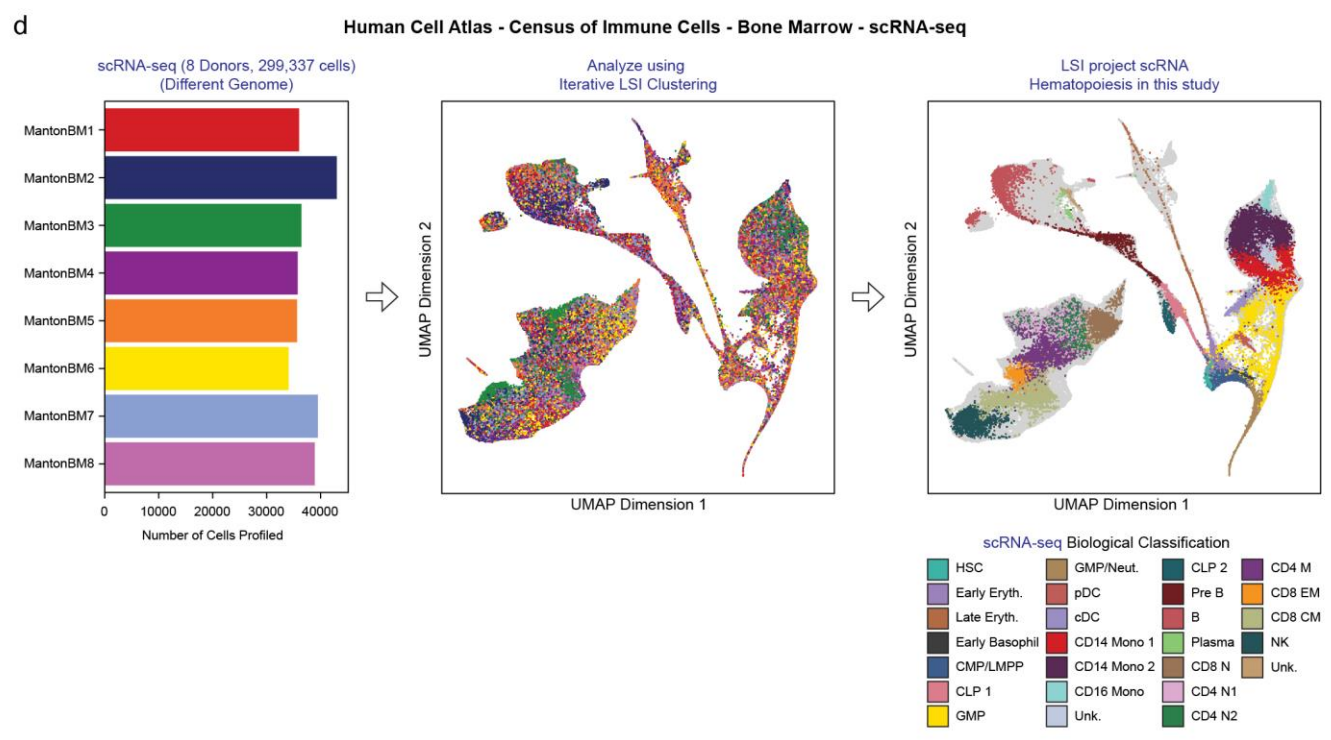

## Supplementary Figure 6

Evaluation of LSI projection workflow for previously published bulk and single-cell hematopoietic data sets across different platforms.

**(a)** Overview of LSI projection workflow. Briefly, when previously computing the TF-IDF transform for the original hematopoietic manifold, we store the feature sums (document frequency) and use this information to compute the TF-IDF transform for the new matrix. We then use the hematopoietic singular value decomposition loadings on the new TF-IDF matrix to project the new matrix into a common subspace. To visualize the hematopoietic subspace, we constructed a UMAP projection using uwot in R. We then used this learned manifold to project the new matrix subspace into the original UMAP projection. **(b)** LSI projection of downsampled previously published bulk sorted hematopoietic data sets<sup>18,20</sup>. (Left) RNA-seq downsampled bulk projections for 49 samples (n = 250 downsampled cells). (Right) ATAC-seq downsampled bulk projections for 90 samples (n = 250 downsampled cells). **(c)** LSI projection of downsampled previously published single-cell hematopoietic data sets labeled by previous classifications<sup>20-22</sup>. (Left) scRNA-seq projections of previous study healthy bone marrow cells (different platform and different aligned genome) colored by previous classifications. (Right) scATAC-seq projections for healthy bone marrow and peripheral blood samples (2 different platforms across 3 studies), colored by ground truth isolated populations. **(d)** Projection of hematopoietic scRNA-seq into of Human Cell Atlas (HCA) Census of Immune Cells. (Left) Number of cells per each of 8 bone marrow donors. (Middle) UMAP projection of LSI iterative clustering of HCA bone marrow scRNA-seq. (Right) LSI projection of our scRNA-seq hematopoietic single cells into HCA bone marrow UMAP colored by cluster definitions.

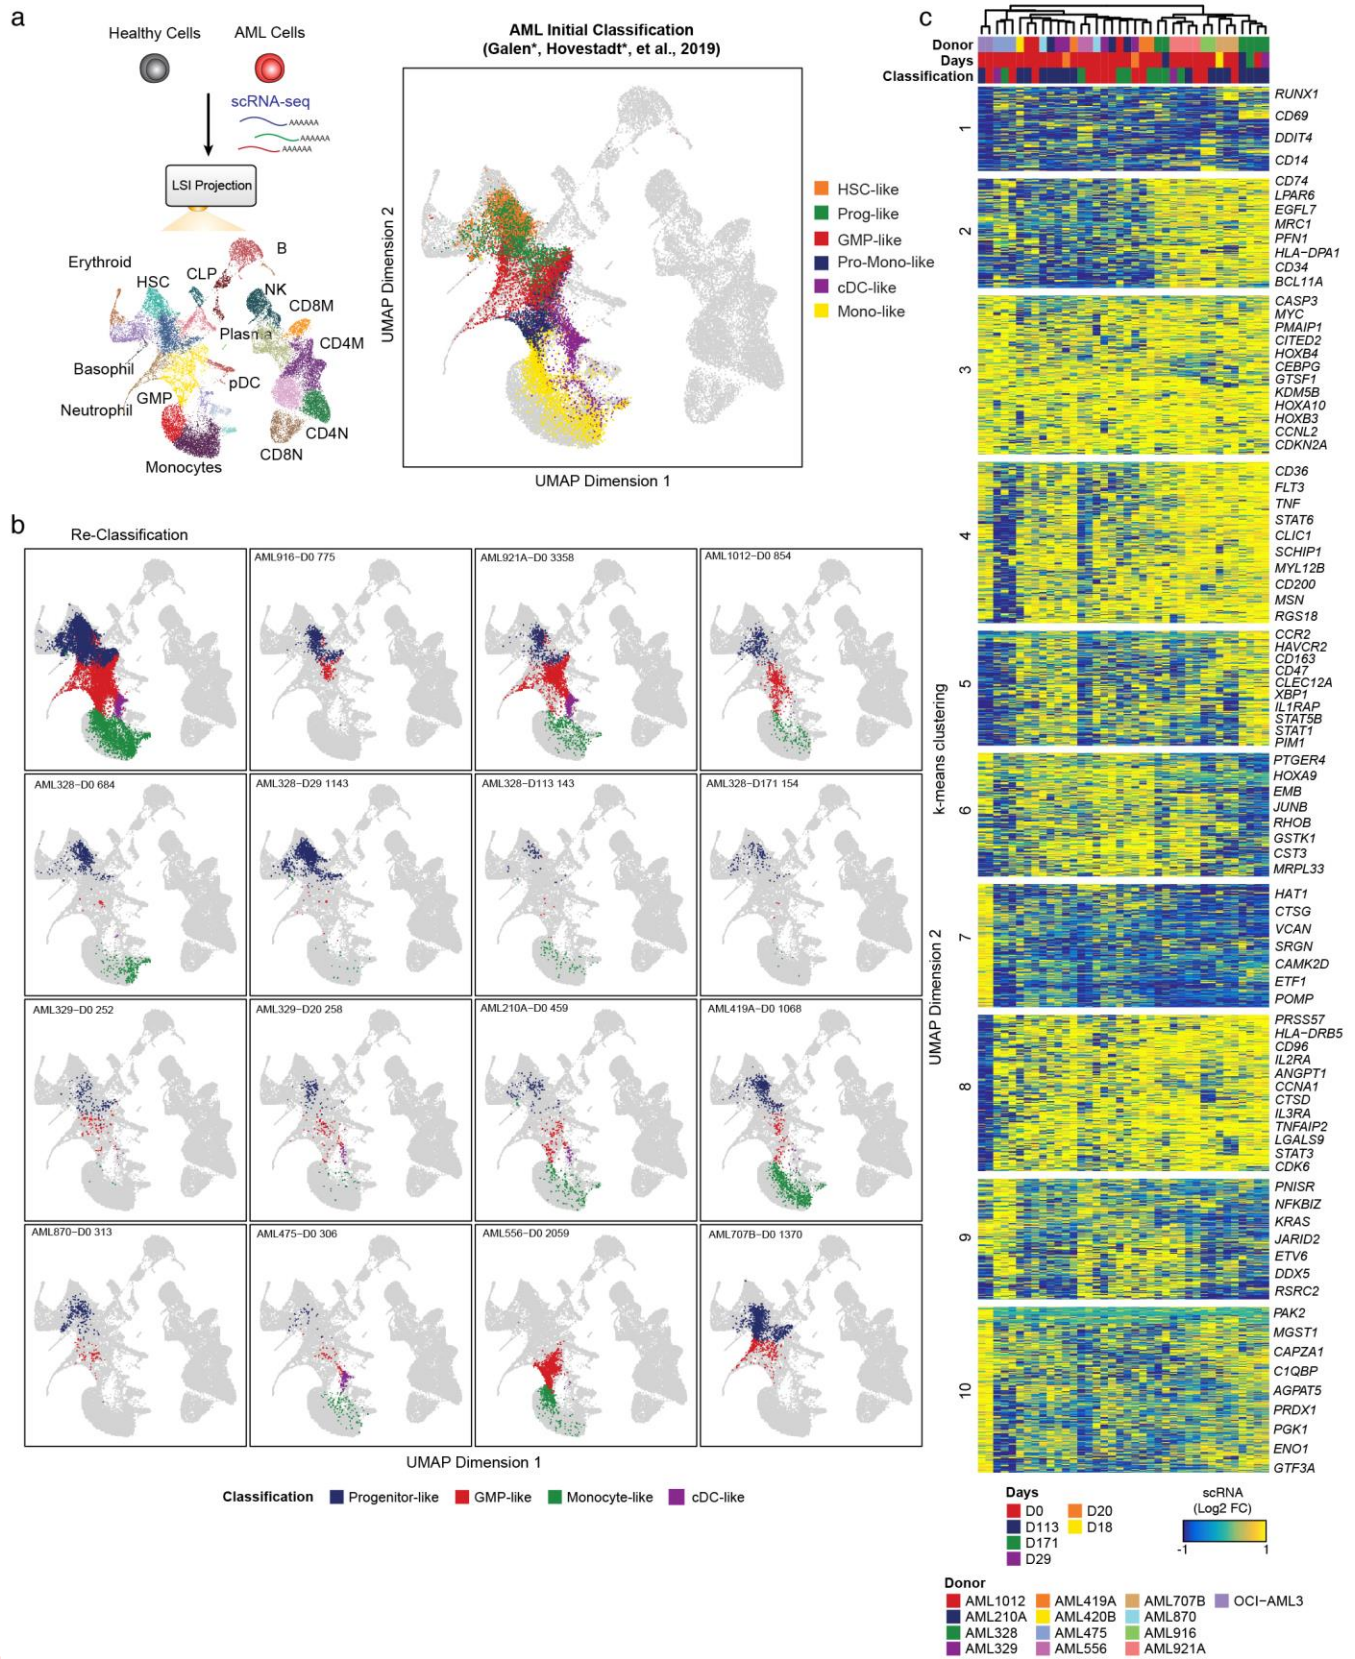

Supplementary Figure 7

LSI projection of previously published healthy and AML scRNA-seq identifies malignant programs across AML subpopulations.

**(a)** (Left) Schematic of LSI projection. (Right) Initial projection of all AML malignant single-cells colored by previous classifications<sup>19</sup> (n = 31,890). **(b)** Re-classification of scRNA-seq AML single-cells based on closest normal cells in healthy hematopoiesis (See Methods). Broader re-classification increases the number of cells per category for improved power in differential analyses. LSI projection for each individual AML samples onto scRNA-seq healthy hematopoiesis colored by re-classifications (denoted is the sample id and number of cells, n = 143 – 3,358). **(c)** K-means differential scRNA-seq heatmap (k = 10), colored by log<sub>2</sub> fold change, comparing each AML sample subpopulations (classifications) vs their closest normal bone marrow cells from the same study<sup>19</sup>.

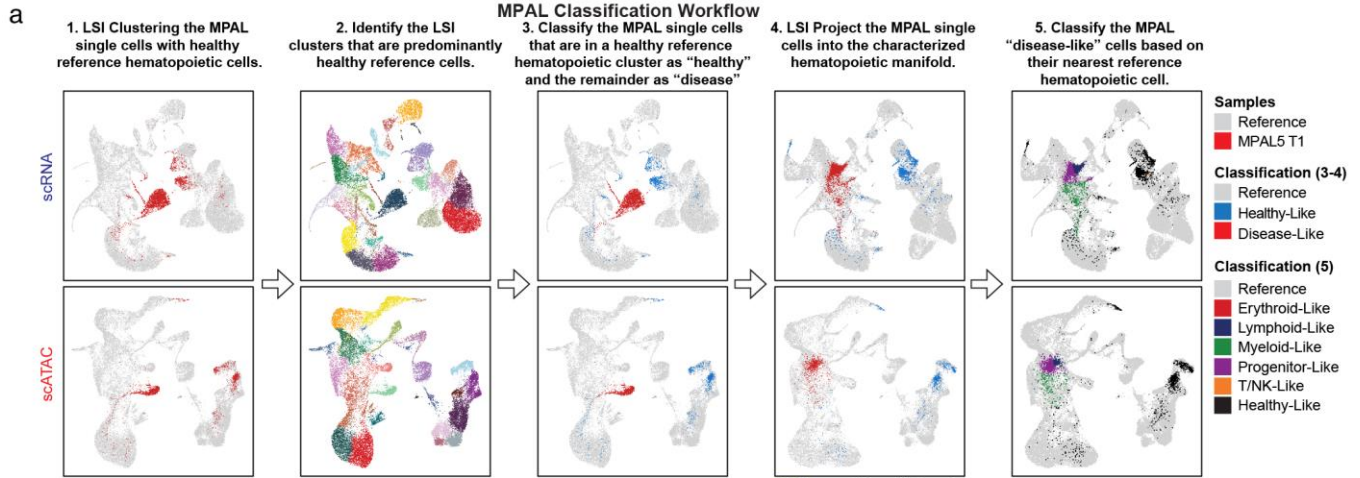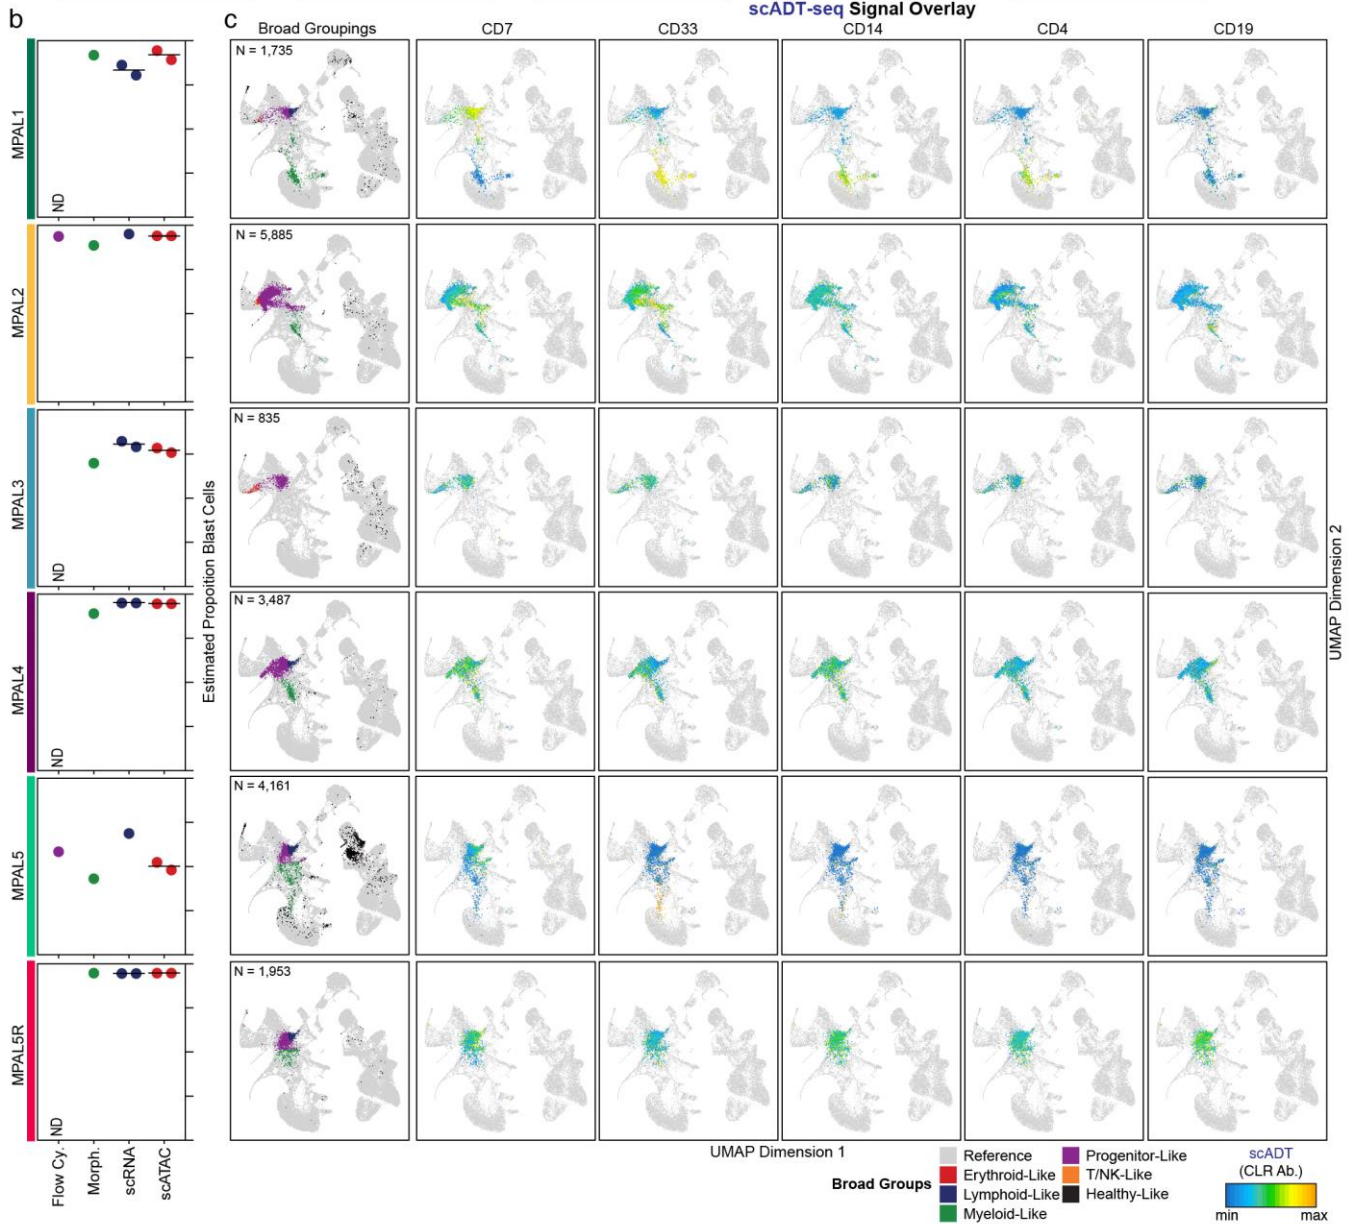



## Supplementary Figure 8

Classification of MPALs by projection onto the hematopoietic hierarchy.

**(a)** MPAL single cell classification workflow for scRNA and scATAC-seq. First cells were clustered with reference hematopoietic cells (1) and classified based on healthy hematopoietic clusters (2-3). Cells were then LSI projected into the reference hematopoietic manifold (4) and then classified based on the nearest reference cell hematopoietic compartment (5). MPAL 5 replicate 1 is shown as an example for scRNA (Top) and scATAC-seq (Bottom). **(b)** Proportion of estimated blast cells for each MPAL with Flow Cytometry, Morphology, scRNA and scATAC-seq (Range is from 0 to 1). **(c)** (Left) Projected MPALs colored by hematopoietic compartments as described in **a**. (Right) scADT-seq overlay of CD7, CD33, CD14, CD4 and CD19 on MPAL single cells LSI projected onto hematopoiesis.

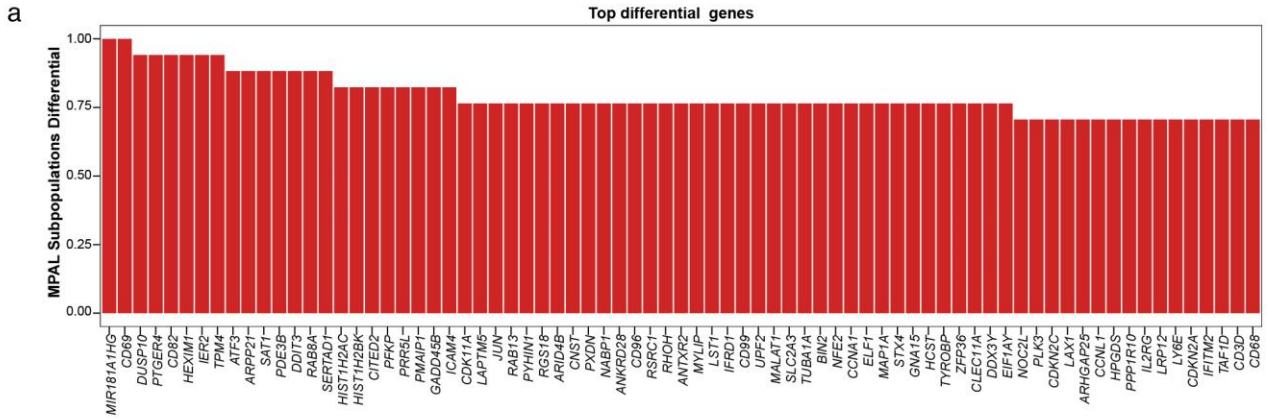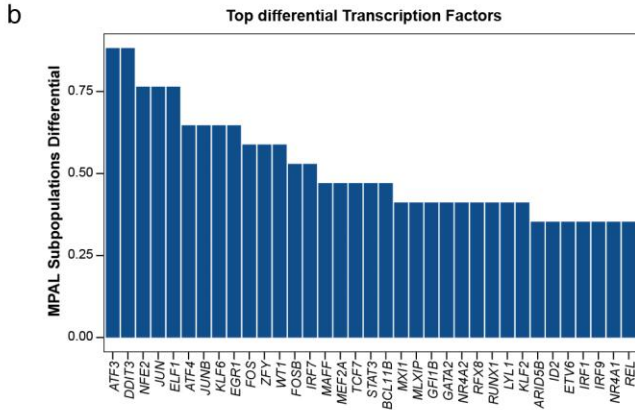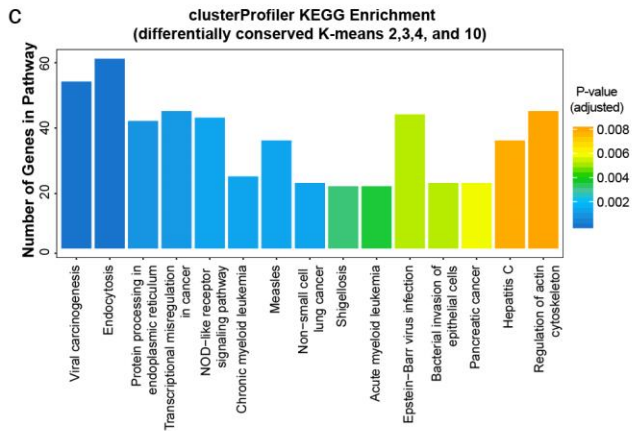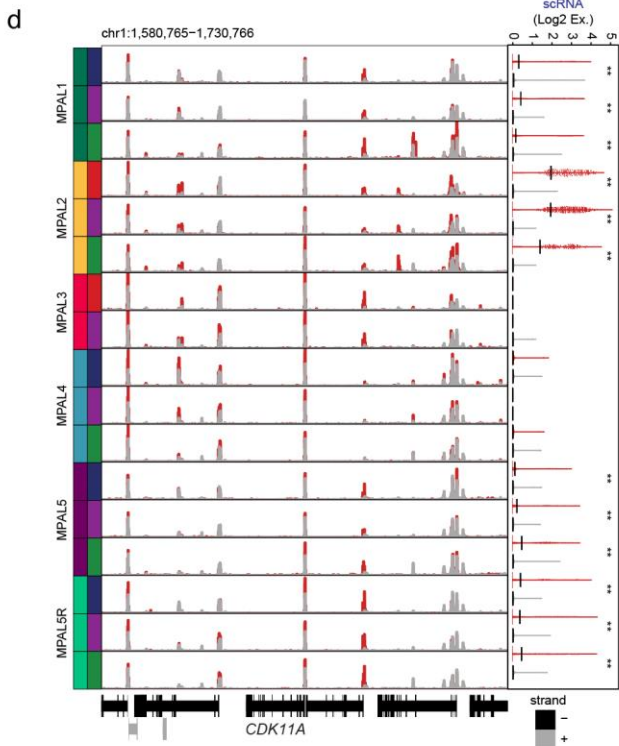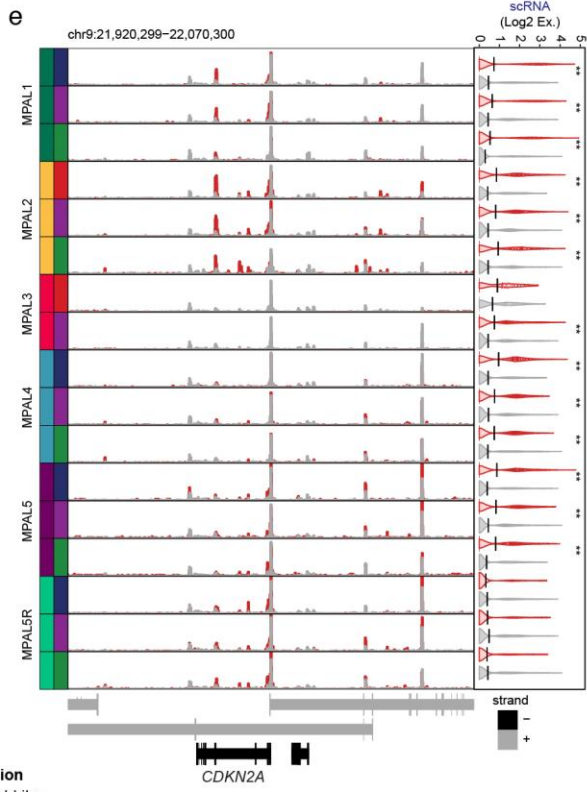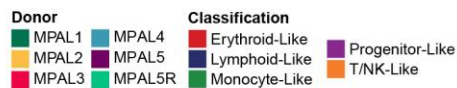

## Supplementary Figure 9

Visualization of top differential genes and accessible peak regions.

**(a)** Top conserved differential genes across the MPAL hematopoietic compartments. **(b)** Top conserved differential transcription factors across the MPAL hematopoietic compartments. **(c)** KEGG pathway enrichment of genes (scRNA) differentially conserved k-means 2, 3, 4, and 10 (Figure 2c,  $n = 2,117$  genes). Color represents the significance (hypergeometric test adjusted p-value with the Benjamini-Hochberg correction) of the KEGG path way generated using clusterProfiler (Yu, G., Wang, L.-G., Han, Y. & He, Q.-Y. clusterProfiler: an R package for comparing biological themes among gene clusters. *OMICS* **16**, 284–287 (2012)). **(d-e)** Multi-omic differential tracks (Left) scATAC tracks showing MPAL disease subpopulations (red) closest normal cells (grey). (Right) Violin plot of the log<sub>2</sub> normalized expression for MPAL disease subpopulations (red) and closest normal cells (grey); black line represents the mean and asterisk denote significance ( $LFC > 0.5$  and  $FDR < 0.01$  from Figure 2c). **(d)** Multi-omic differential track of *CDK11A*, up-regulated in MPALs 1, 2, 5 and 5R ( $n = 89 - 500$ ). **(e)** Multi-omic differential track of *CDKN2A*, up-regulated in MPALs 1, 2, 3, 4, and 5 ( $n = 89 - 500$ ).

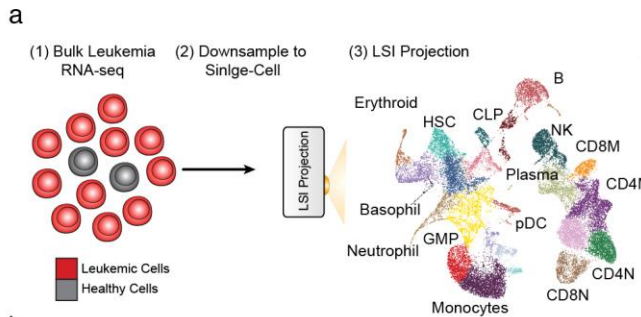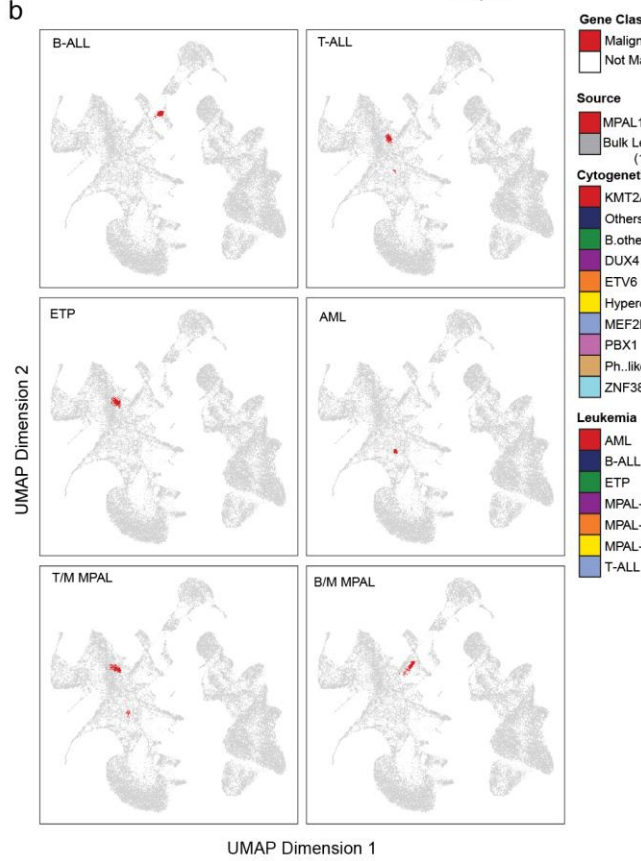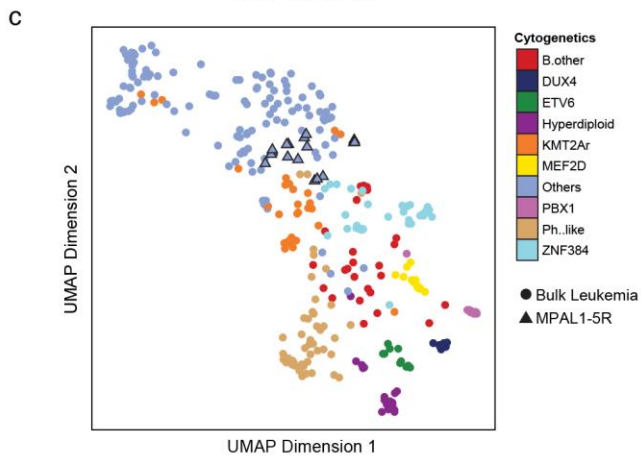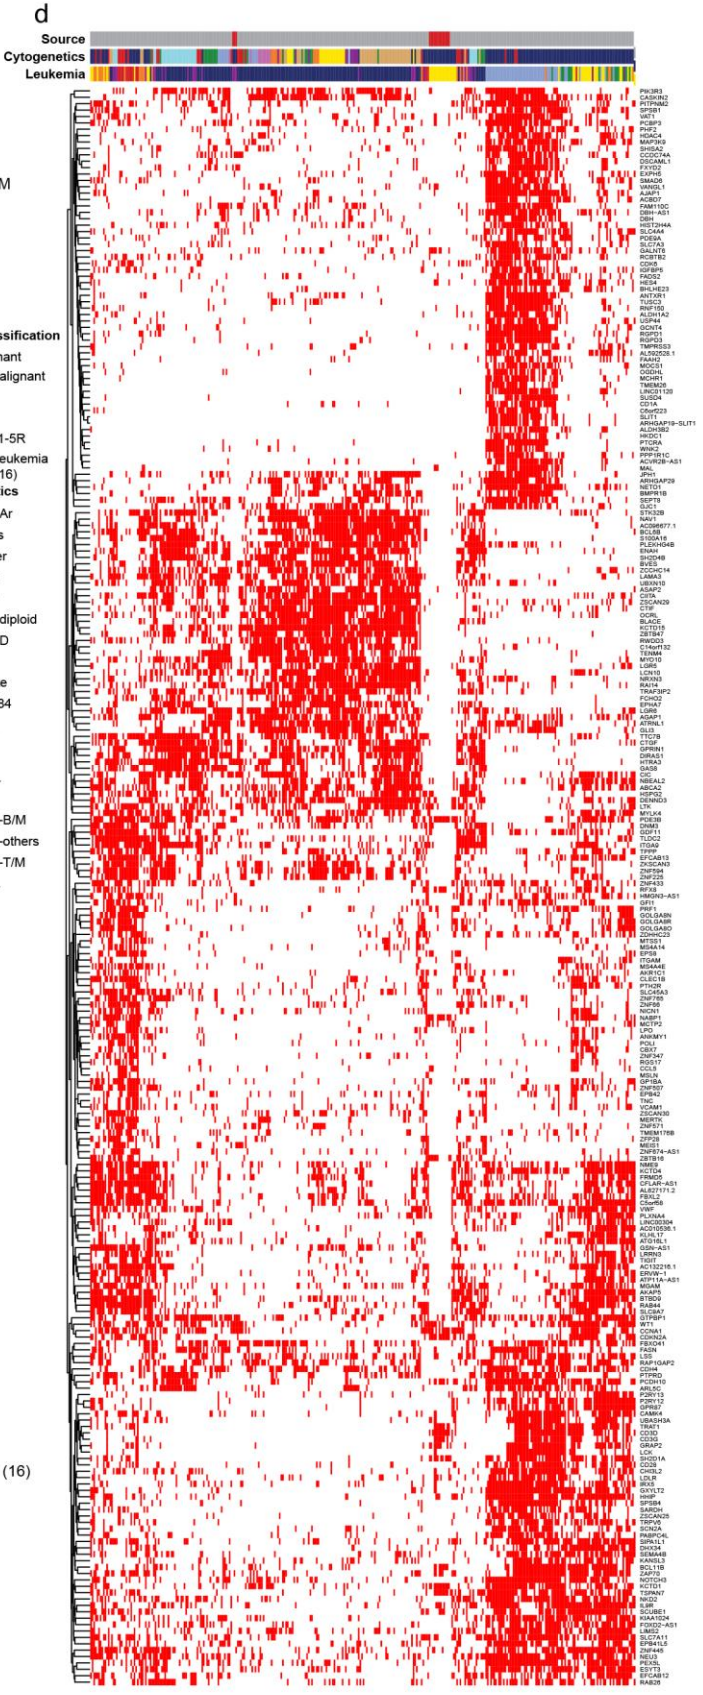

## Supplementary Figure 10

LSI projection of bulk leukemia RNA-seq onto hematopoietic hierarchy.

**(a)** Schematic of LSI projection of downsampled bulk leukemia RNA-seq onto healthy hematopoiesis. **(b)** Representative downsampled LSI projections (n = 250) for B-ALLs, non-ETP T-ALLs, ETP T-ALLs, AMLs, T/M MPALs and B/M MPALs from previous studies<sup>16</sup>. **(c)** LSI UMAP of differentially up-regulated gene expression profiles across bulk leukemias<sup>16</sup> (n = 321) and MPAL subpopulations assayed in this study (n = 17), colored by cytogenetics. **(d)** Binary heatmap of variable malignant genes across leukemia classifications. Each cell in the heatmap is colored whether the gene was identified as malignant for the leukemic sample.

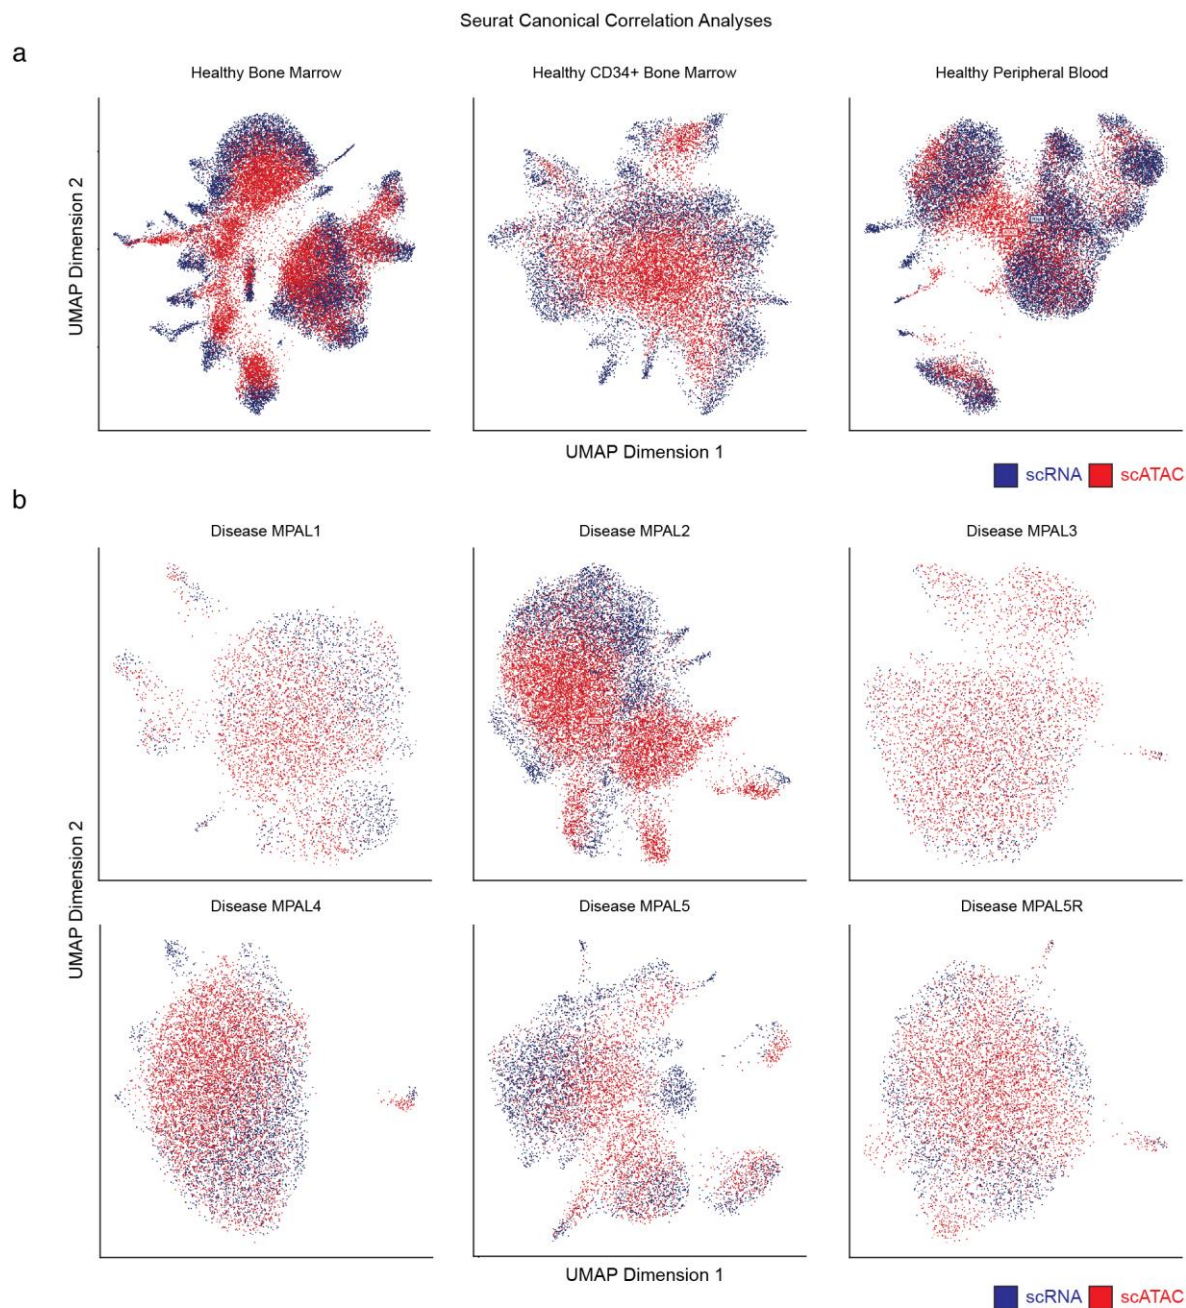

### Supplementary Figure 11

Seurat canonical correlation analysis alignment of scRNA and scATAC-seq hematopoietic and MPAL samples.

**(a)** UMAP of CCA alignment of scATAC-seq using Cicero gene activity scores and scRNA-seq for (Left) bone marrow (nATAC = 12,602; nRNA = 16,510), (Middle) CD34+ enriched bone marrow (nATAC = 8,176; nRNA = 10,160), (Right) peripheral blood (nATAC = 14,804; nRNA = 8,368). **(b)** UMAP of CCA alignment of scATAC-seq using Cicero gene activity scores and scRNA-seq for MPAL samples 1-5R (nATAC = 4,127 – 8,255; nRNA = 835 – 5,885).

**a**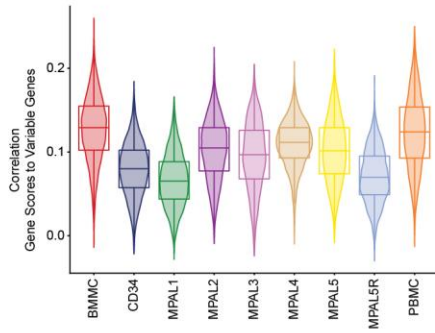**b**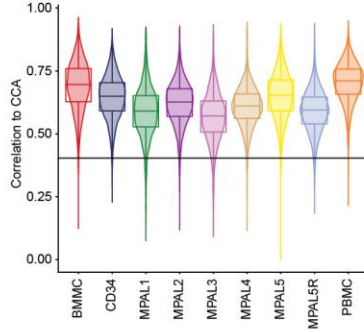**Classification**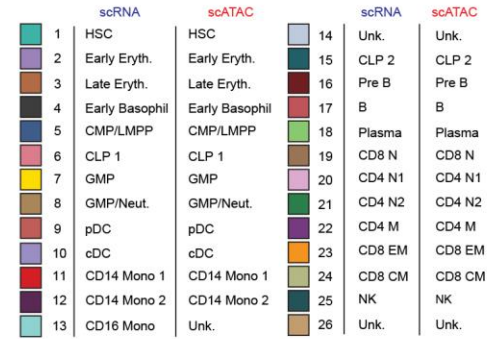**c**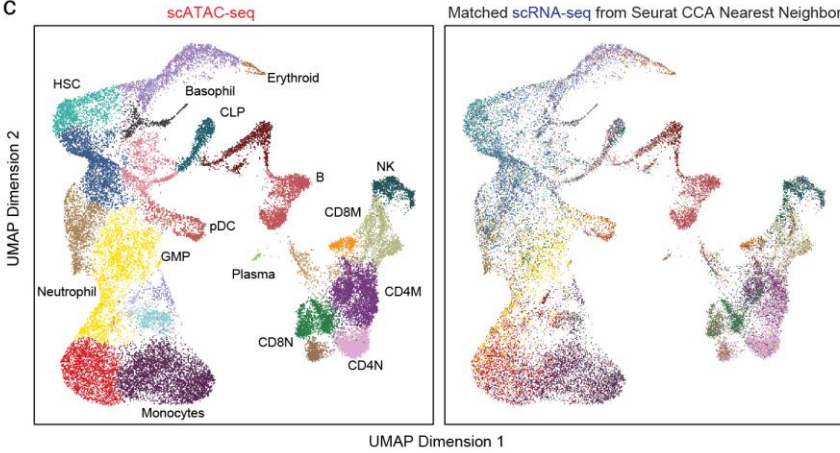**d**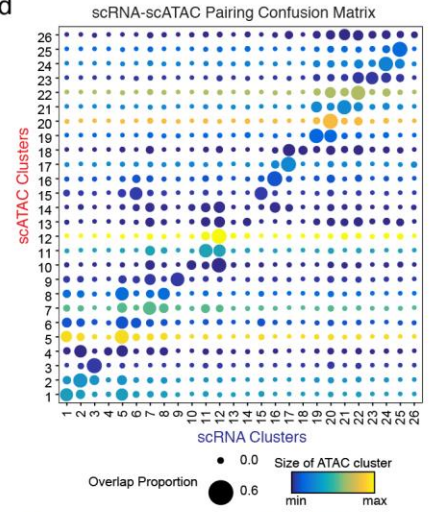**e**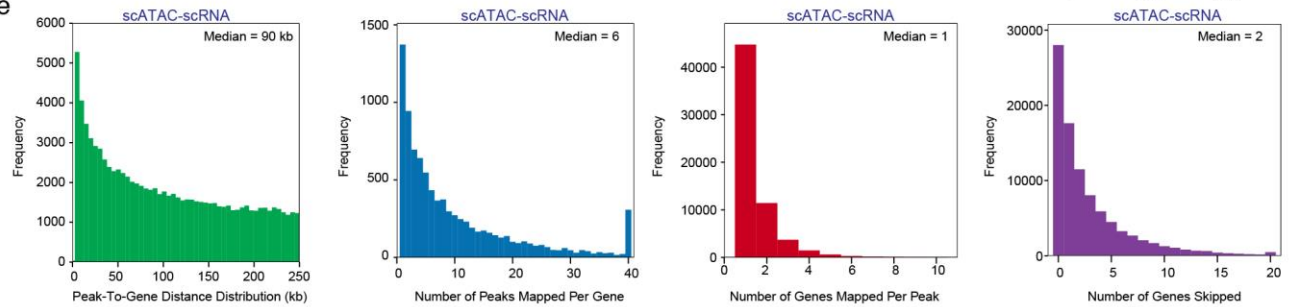**f**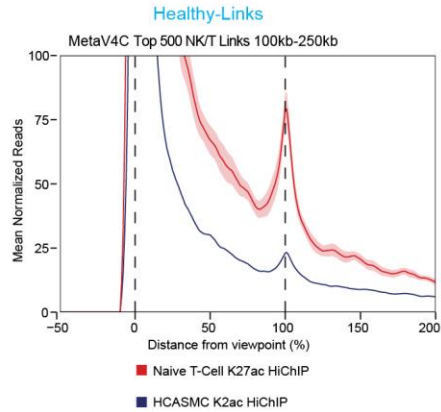**g**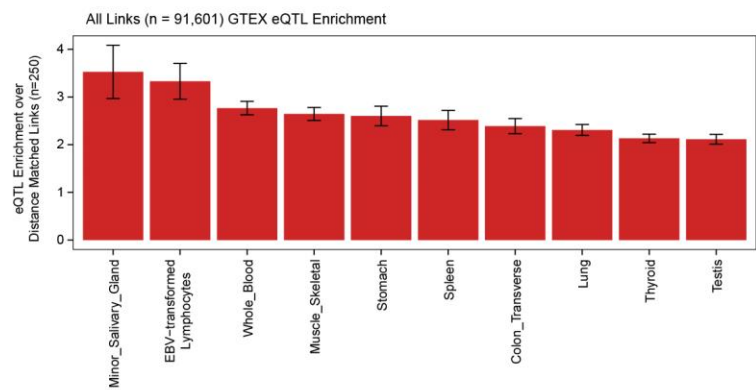

## Supplementary Figure 12

Evaluation of scRNA and scATAC-seq alignment and peak-to-gene linkage across hematopoiesis and MPAL samples.

**(a)** Spearman rank correlation between scATAC-seq Cicero gene activity scores to scRNA-seq for each mapped cell within across all biological experiments ( $n = 4,127 - 16,510$ ). **(b)** Pearson correlation of CCA scRNA and scATAC-seq nearest-neighbors. The cutoff ( $R > 0.45$ ) for high quality nearest neighbor mappings is shown ( $n = 4,127 - 16,510$ ). **(c)** (Left) UMAP of scATAC-seq hematopoiesis colored by scATAC-seq clusters ( $n = 35,038$ ). (Right) UMAP of scATAC-seq hematopoiesis colored by filtered mapped scRNA-seq clusters ( $n = 34,507$ ). **(d)** Confusion matrix of initial clusters for mapped scRNA-seq to scATAC-seq clusters for hematopoiesis (Figure 1b-c). Above shows the assigned biological classifications for each cluster across both scRNA and scATAC-seq. **(e)** (Left) Distribution of peak-to-gene distances. (Left-Middle) Distribution of number of peaks mapped per gene (median = 6). (Right-Middle) Distribution of number of genes mapped per peak (median = 1). (Right) Distribution of number of genes skipped for peak-to-gene links (median = 2). **(f)** MetaV4C plots of K27ac HiChIP in Naive T and HCASMC cells for top 500 biased T/NK (broad classification) peak-to-gene links that are identified only in healthy hematopoiesis. The line represents the average signal and the shading represents the range of the signal times the square root of 2 between biological replicates ( $n = 2$ ). **(g)** Peak-to-gene links ( $n = 91,601$ ) enrichment in GTEx eQTLs over a permuted background distance-matched set (permutations = 250) for the union set of peak-to-gene links. The mean enrichment is shown, and the error bars indicate 1 standard deviation. Box-whisker plot; lower whisker is the lowest value greater than the 25% quantile minus 1.5 times the interquartile range (IQR), the lower hinge is the 25% quantile, the middle is the median, the upper hinge is the 75% quantile and the upper whisker is the largest value less than the 75% quantile plus 1.5 times the IQR.



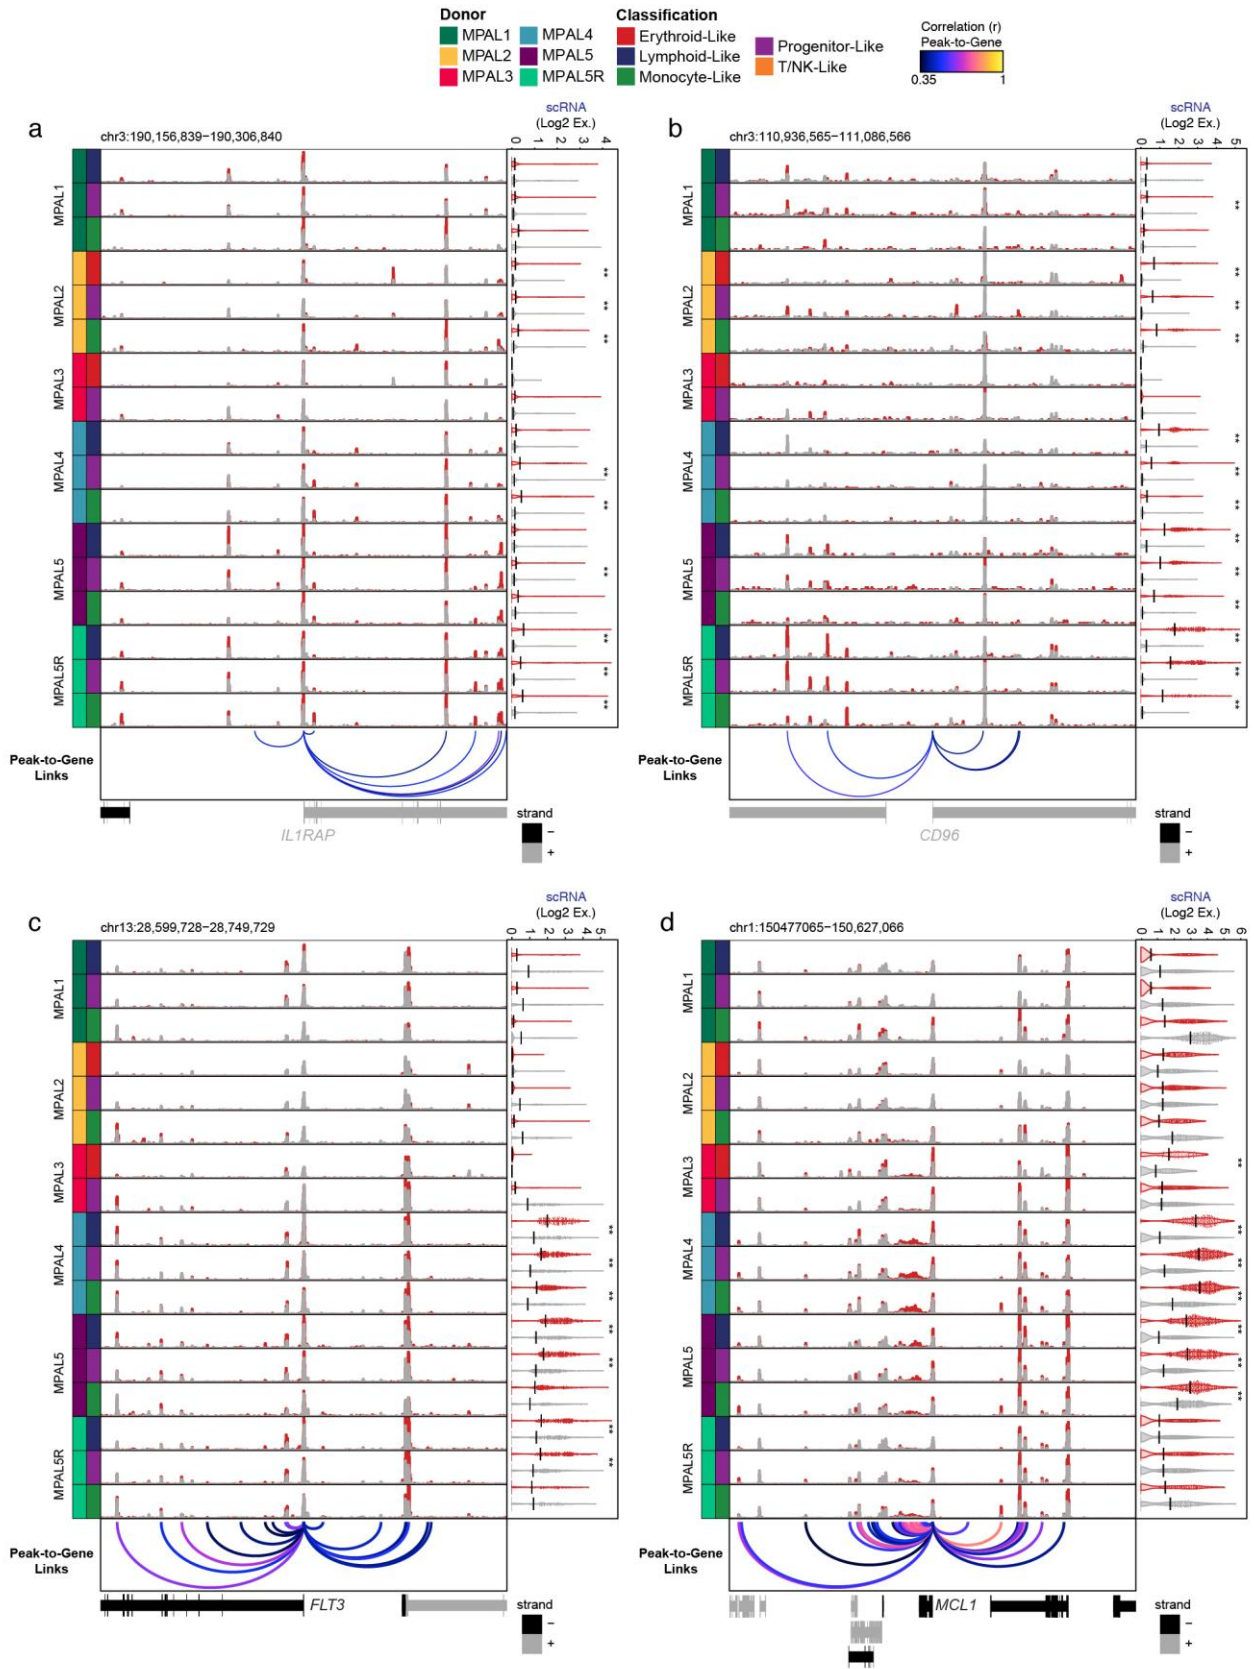

### Supplementary Figure 13

Peak-to-gene links nominate putative regulatory regions that nominate key leukemic genes.

**(a-d)** Multi-omic differential track; (Middle) Aggregated scATAC tracks showing MPAL disease subpopulations (red) and closest normal cells (grey). (Right) Distribution of log<sub>2</sub> normalized expression of gene of interest for MPAL disease subpopulations (red) and closest normal cells (grey); black line represents the mean and asterisk denote significance (LFC > 0.5 and FDR < 0.01 from Figure 2c). Violin plot represents the smoothed density of the distribution of the log<sub>2</sub> normalized expression and the black line represents the mean log<sub>2</sub> normalized expression. (Bottom) Peak-to-gene links for gene of interest colored by Pearson correlation of the peak accessibility and gene expression (see methods). **(a)** Multi-omic differential track for *IL1RAP* (n = 89 - 500). **(b)** Multi-omic differential track for *CD96* (n = 89 - 500). **(c)** Multi-omic differential track for *FLT3* (n = 89 - 500). **(d)** Multi-omic differential track for *MCL1* (n = 89 - 500).

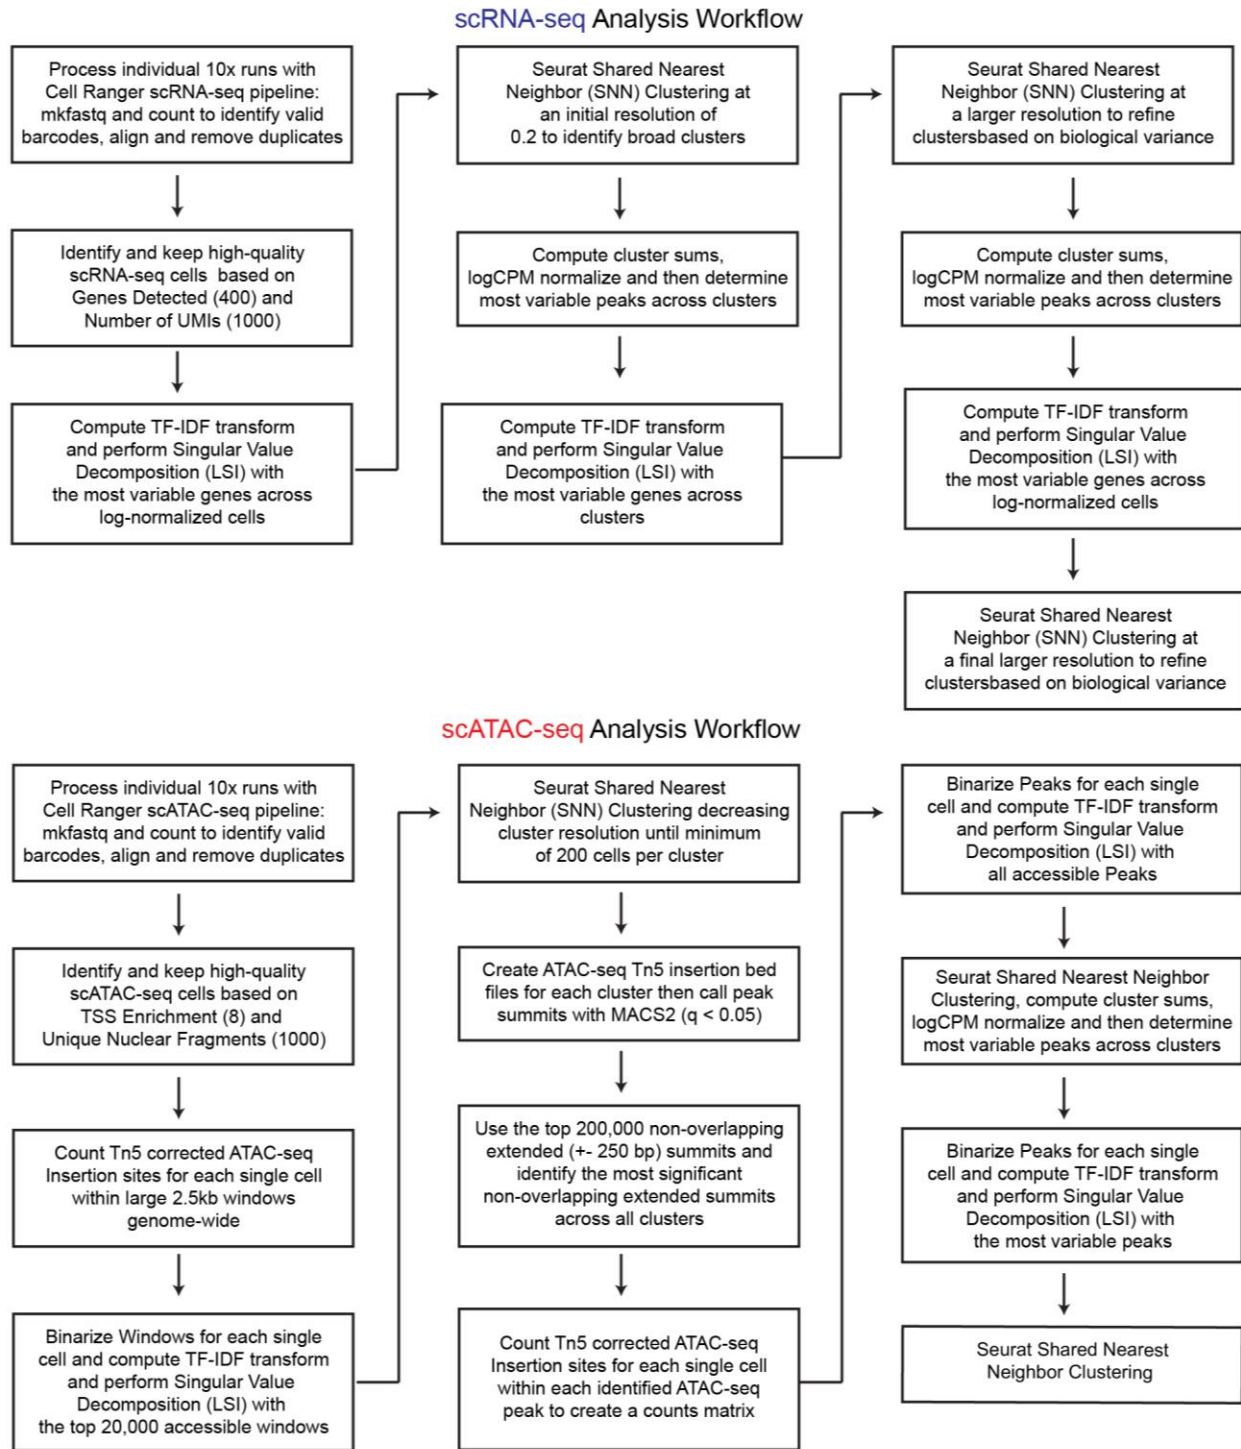

**Supplementary Figure 14**

Analysis workflows for processing of scRNA-seq and scATAC-seq data.

(Top) scRNA-seq analysis workflow. Briefly cells are aligned using 10x cell ranger, quality filtered, and clustered using a feature optimization approach (see methods). (Bottom) scATAC-seq analysis workflow. Briefly cells are aligned using 10x cell ranger atac, quality filtered, clustered in large windows genome-wide, peak-calling on clusters, creation of a counts matrix and clustered using a feature optimization approach (see methods). (see methods).
