# Supplementary material
Source: PubMed Central journal article supplement (PMC7258684)
Supplement: NIHMS1590877-supplement-Reporting_Summary.pdf [file NIHMS1590877-supplement-Reporting_Summary.pdf]

## Reporting Summary

Nature Research wishes to improve the reproducibility of the work that we publish. This form provides structure for consistency and transparency in reporting. For further information on Nature Research policies, see [Authors & Referees](#) and the [Editorial Policy Checklist](#).

### Statistics

For all statistical analyses, confirm that the following items are present in the figure legend, table legend, main text, or Methods section.

n/a Confirmed

- The exact sample size ( $n$ ) for each experimental group/condition, given as a discrete number and unit of measurement
- A statement on whether measurements were taken from distinct samples or whether the same sample was measured repeatedly
- The statistical test(s) used AND whether they are one- or two-sided  
*Only common tests should be described solely by name; describe more complex techniques in the Methods section.*
- A description of all covariates tested
- A description of any assumptions or corrections, such as tests of normality and adjustment for multiple comparisons
- A full description of the statistical parameters including central tendency (e.g. means) or other basic estimates (e.g. regression coefficient) AND variation (e.g. standard deviation) or associated estimates of uncertainty (e.g. confidence intervals)
- For null hypothesis testing, the test statistic (e.g.  $F$ ,  $t$ ,  $r$ ) with confidence intervals, effect sizes, degrees of freedom and  $P$  value noted  
*Give  $P$  values as exact values whenever suitable.*
- For Bayesian analysis, information on the choice of priors and Markov chain Monte Carlo settings
- For hierarchical and complex designs, identification of the appropriate level for tests and full reporting of outcomes
- Estimates of effect sizes (e.g. Cohen's  $d$ , Pearson's  $r$ ), indicating how they were calculated

*Our web collection on [statistics for biologists](#) contains articles on many of the points above.*

### Software and code

Policy information about [availability of computer code](#)

Data collection

Cell Ranger ATAC 1.0.0 – Barcode Identification, Alignment, Filter, Deduplication

## Data analysis

macs2 2.1.1.20160309 – Peak Calling  
 R version 3.5.1 – R environment for all custom code  
 Irlba 2.3.2 – Running PCA/SVD on large matrices.  
 Reticulate 1.10 – Used for running Python UMAP implementation within R.  
 Rcpp 1.0.0 – Used for writing helpful C++ code to speed up operations.  
 matrixStats 0.54.0 – Used for mathematical operations on large matrices.  
 Cicero 1.0.13 – Used for calculating gene activity scores.  
 chromVAR\_1.2.0 – Calculating TF deviation scores which can be associated with TF activity.  
 SingleCellExperiment 1.2.0 – R Data Class Environment used throughout analyses.  
 Motifmatchr 1.2.0 – Matching TF Motifs within peak regions.  
 Seurat 2.3.4 – SNN Graph Clustering Implementation.  
 GenomicFeatures 1.32.2 – Genomic Ranges Operations used for overlap analyses.  
 GenomicRanges 1.32.7 - Genomic Ranges Operations used for overlap analyses.  
 Matrix 1.2-14 – Sparse Matrix math implementations.  
 BSgenome 1.48.0 – Toolkit used for getting Genomic DNA sequences for motif matching and footprinting.  
 Rsamtools 1.32.3 – For manipulating BAM files within R.  
 edgeR 3.24.3 - Toolkit for analyzing differential RNA-seq.  
 FNN 1.1.3 - Identifying Nearest Neighbors.  
 uwot 0.1.4 - Creation of UMAP Embeddings in R.  
 BWA 0.7.17 - Alignment of Fastqs to genomic reference DNA.  
 stats (R 3.5.1) - R base statistical software.  
 survival 2.42-3 - Survival Analysis software used for TCGA analysis.  
 clusterProfiler 3.10.1- enrichment of GO/KEGG terms in gene sets.

For manuscripts utilizing custom algorithms or software that are central to the research but not yet described in published literature, software must be made available to editors/reviewers. We strongly encourage code deposition in a community repository (e.g. GitHub). See the Nature Research [guidelines for submitting code & software](#) for further information.

## Data

Policy information about [availability of data](#)

All manuscripts must include a [data availability statement](#). This statement should provide the following information, where applicable:

- Accession codes, unique identifiers, or web links for publicly available datasets
- A list of figures that have associated raw data
- A description of any restrictions on data availability

### CODE AVAILABILITY

Code used in this study will be posted on GitHub for main analyses (<https://github.com/GreenleafLab/MPAL-Single-Cell-2019>).

### DATA AVAILABILITY

Sequencing data will be deposited in the Gene Expression Omnibus (GEO). There are no restrictions on data availability or use. The main single-cell matrices are stored as Bioconductor Summarized Experiment's (scRNA, scATAC, chromVAR, Log Gene Scores) for each of the main analyses will be accessible from GitHub.

## Field-specific reporting

Please select the one below that is the best fit for your research. If you are not sure, read the appropriate sections before making your selection.

Life sciences       Behavioural & social sciences       Ecological, evolutionary & environmental sciences

For a reference copy of the document with all sections, see [nature.com/documents/nr-reporting-summary-flat.pdf](https://www.nature.com/documents/nr-reporting-summary-flat.pdf)

## Life sciences study design

All studies must disclose on these points even when the disclosure is negative.

|                 |                                                                                                                                                                                                                       |
|-----------------|-----------------------------------------------------------------------------------------------------------------------------------------------------------------------------------------------------------------------|
| Sample size     | Our sample size was determined by the number of MPAL patients diagnosed at Stanford since 2011 (n = 5). We performed multi-omic analyses on these samples in technical duplicate, profiling over 50,000 single cells. |
| Data exclusions | No inclusion or exclusion criteria were used for human studies. No data were excluded from the manuscript.                                                                                                            |
| Replication     | All results presented in manuscript were reliably reproduced across technical duplicate. Additionally we compared differential results to previously published data sets.                                             |
| Randomization   | No randomization of human participants was used.                                                                                                                                                                      |
| Blinding        | No blinding was used.                                                                                                                                                                                                 |

# Reporting for specific materials, systems and methods

We require information from authors about some types of materials, experimental systems and methods used in many studies. Here, indicate whether each material, system or method listed is relevant to your study. If you are not sure if a list item applies to your research, read the appropriate section before selecting a response.

## Materials & experimental systems

| n/a                                 | Involved in the study                                           |
|-------------------------------------|-----------------------------------------------------------------|
| <input type="checkbox"/>            | <input checked="" type="checkbox"/> Antibodies                  |
| <input checked="" type="checkbox"/> | <input type="checkbox"/> Eukaryotic cell lines                  |
| <input checked="" type="checkbox"/> | <input type="checkbox"/> Palaeontology                          |
| <input checked="" type="checkbox"/> | <input type="checkbox"/> Animals and other organisms            |
| <input type="checkbox"/>            | <input checked="" type="checkbox"/> Human research participants |
| <input checked="" type="checkbox"/> | <input type="checkbox"/> Clinical data                          |

## Methods

| n/a                                 | Involved in the study                              |
|-------------------------------------|----------------------------------------------------|
| <input checked="" type="checkbox"/> | <input type="checkbox"/> ChIP-seq                  |
| <input type="checkbox"/>            | <input checked="" type="checkbox"/> Flow cytometry |
| <input checked="" type="checkbox"/> | <input type="checkbox"/> MRI-based neuroimaging    |

## Antibodies

### Antibodies used

#### FACS for MPAL Patients:

BD Biosciences Catalog - 340662 - CD3 (clone SK7) PE  
 BD Biosciences Catalog - 340738- CD7 (M-T701) FITC  
 BD Biosciences Catalog - 340952 - CD45 (clone 2D1) PerCP-Cy™5.5  
 BD Biosciences Catalog - 555824 - CD34 (clone 581) APC  
 BD Biosciences Catalog - 340722- CD19 (clone SJ25C1) APC  
 BD Biosciences Catalog - 340673- CD20 (clone L27) FITC  
 BD Biosciences Catalog - 340654 - CD79a (clone HM47) PE  
 BD Biosciences Catalog - 561708 - CD14 (M5E2) APC  
 BD Biosciences Catalog - 644386 - CD64 (clone 10.1) PE  
 Agilent - F071401-1- MPO (clone MPO-7) FITC  
 Beckman Coulter - IM0775U - CD38 (clone LS198-4-3) FITC  
 Beckman Coulter - IM3524U - TdT (HT1 + HT4 + HT\* + HT9) FITC

Antibody Derived Tags (ADT)-sequencing: all antibodies are from biolengend:

#### Antibody list for PBMC & BMMC

| Category                   | Specificity                | Clone                       | Reactivity | Barcode          | Sequence |
|----------------------------|----------------------------|-----------------------------|------------|------------------|----------|
| TotalSeq™ Catalog - 300477 | -B CD3 CD3                 | TotalB UCHT1                | Human      | AACAAGACCCCTTGAG |          |
| TotalSeq™ Catalog - 300565 | -B CD4 CD4                 | TotalB RPA-T4               | Human      | TACCCGTAATAGCGT  |          |
| TotalSeq™ Catalog - 301069 | -B CD8a CD8a               | TotalB RPA-T8               | Human      | ATTGGCACTCAGATG  |          |
| TotalSeq™ Catalog - 301857 | -B CD14 CD14               | TotalB M5E2                 | Human      | GAAAGTCAAAGCACT  |          |
| TotalSeq™ Catalog - 323051 | -B CD15 CD15               | TotalB W6D3                 | Human      | ACGAATCAATCTGTG  |          |
| TotalSeq™ Catalog - 302063 | -B CD16 CD16               | TotalB 3G8                  | Human      | GTCTTTGTCACTGCA  |          |
| TotalSeq™ Catalog - 302647 | -B CD25 CD25               | TotalB BC96                 | Human      | GTGCATTCAACAGTA  |          |
| TotalSeq™ Catalog - 302263 | -B CD19 CD19               | TotalB HIB19                | Human      | TCAACGCTTGGCTAG  |          |
| TotalSeq™ Catalog - 304161 | -B CD45RA CD45RA           | TotalB HI100                | Human      | GATGAGAACAGGTTT  |          |
| TotalSeq™ Catalog - 304257 | -B CD45RO CD45RO           | TotalB UCHL1                | Human      | TGCATGTCATCGGTG  |          |
| TotalSeq™ Catalog - 392423 | -B CD56 (NCAM) Recombinant | CD56_TotalB QA17A16         | Human      | GTTGTCCGACAATAC  |          |
| TotalSeq™ Catalog - 329961 | -B PD-1 PD-1               | TotalB EH12.2H7             | Human      | AAGTCGTGAGGCATG  |          |
| TotalSeq™ Catalog - 372727 | -B TIGIT TIGIT             | TotalB A15153G              | Human      | TGAAGGCTCATTGTG  |          |
| TotalSeq™ Catalog - 351354 | -B CD127 CD127             | TotalB A019D5               | Human      | ACATTGACGCAACTA  |          |
| TotalSeq™ Catalog - 400291 | -B Mouse_IgG2a             | MouseIlgG2a_TotalB MOPC-173 | Mouse      | CTCTATTAGACCAG   |          |
| TotalSeq™ Catalog - 400185 | -B Mouse_IgG1              | MouseIlgG1_TotalB MOPC-21   | Mouse      | ACTCACTGGAGTCTC  |          |
| TotalSeq™ Catalog - 400379 | -B Mouse_IgG2b             | MouseIlgG2b_TotalB MPC-11   | Mouse      | ATCACATCGTTGCCA  |          |

#### Antibody list for CD34+ BM & MPAL samples

| Category                   | Barcode | Specificity      | Clone | Reactivity      | Barcode | Sequence |
|----------------------------|---------|------------------|-------|-----------------|---------|----------|
| TotalSeq™ Catalog - 100251 | -A 0049 | CD3 SK7          | Human | TATCCCTTGGGATGG |         |          |
| TotalSeq™ Catalog - 317451 | -A 0045 | CD4 SK3          | Human | GAGGTTAGTGATGGA |         |          |
| TotalSeq™ Catalog - 343123 | -A 0066 | CD7 CD7-6B7      | Human | TGGATTCCCGGACTT |         |          |
| TotalSeq™ Catalog - 301067 | -A 0080 | CD8a RPA-T8      | Human | GCTGCGCTTTCCATT |         |          |
| TotalSeq™ Catalog - 312231 | -A 0062 | CD10 HI10a       | Human | CAGCCATTCAATAGG |         |          |
| TotalSeq™ Catalog - 367131 | -A 0081 | CD14 M5E2        | Human | TCTCAGACCTCCGTA |         |          |
| TotalSeq™ Catalog - 302259 | -A 0050 | CD19 HIB19       | Human | CTGGGCAATTACTCG |         |          |
| TotalSeq™ Catalog - 366629 | -A 0052 | CD33 P67.6       | Human | TAACTCAGGCCTAT  |         |          |
| TotalSeq™ Catalog - 304157 | -A 0063 | CD45RA HI100     | Human | TCAATCCTTCCGCTT |         |          |
| TotalSeq™ Catalog - 328135 | -A 0060 | CD90 (Thy1) 5E10 | Human | GCATTGTACGATTCA |         |          |
| TotalSeq™ Catalog - 306037 | -A 0064 | CD123 6H6        | Human | CTTCACTCTGTCAAG |         |          |

## Validation

Highly optimized flow cytometric analysis was used for this study that has been shown to be specific in previous studies.

For the flow cytometry analysis of MPALs, we used lymphocytes as a control for validation for the antibodies. Additionally, BD Biosciences, Agilent and Beckman Coulter have validated these antibodies directly by testing vs an isotype control.

For the antibody derived tags (ADT) we first performed this analysis on human peripheral blood and bone marrow segregating known subpopulations. Additionally, Biolegend tests for every antibody by staining multiple target cells (with positive and negative controls) and with serial dilutions to make sure the titer is appropriate.

## Human research participants

Policy information about [studies involving human research participants](#)

## Population characteristics

Healthy human subjects were male and female, ages 20-50. MPAL patients were male and female, ages 20-75. MPAL patients were diagnosed with mixed phenotype acute leukemia according to WHO 2016 classification.

## Recruitment

No selective recruitment of healthy subjects was performed. MPAL samples were obtained from patients at Stanford Hospital and Clinics with acute leukemia. MPAL is an extremely rare leukemia and all patients with a diagnosis of MPAL were included in the study, regardless of age. This study did not attempt to exclude healthy volunteers or patients based on sex, race, or ethnicity.

## Ethics oversight

This study was approved by the Stanford University Administrative Panels on Human Subjects in Medical Research, and written informed consent was obtained from all participants.

Note that full information on the approval of the study protocol must also be provided in the manuscript.

## Flow Cytometry

### Plots

Confirm that:

- The axis labels state the marker and fluorochrome used (e.g. CD4-FITC).
- The axis scales are clearly visible. Include numbers along axes only for bottom left plot of group (a 'group' is an analysis of identical markers).
- All plots are contour plots with outliers or pseudocolor plots.
- A numerical value for number of cells or percentage (with statistics) is provided.

### Methodology

## Sample preparation

Peripheral blood and bone marrow aspirate samples were processed by Lymphoprep (STEMCELL Technologies) gradient centrifugation and fresh frozen in Bambanker media.

## Instrument

Flow cytometry was performed on a FACSCalibur or FACSCanto II (Becton Dickinson, San Jose, Ca, USA) cytometer using commercially available antibodies.

## Software

Data was analyzed using FlowJo v10 software.

## Cell population abundance

No sorting was performed on various samples. 30,000 events were collected and analyzed on all MPAL samples.

## Gating strategy

Cells were first Live/Dead selected (using 7-AAD). Lymphocytes were identified by low side-scatter and bright CD45 expression. The gate was validated by backgating on CD3-positive or CD19-positive events. Blasts were identified by low side-scatter and dim CD45 expression. The gate was further assessed by backgating on CD34-positive events. Gates were drawn by additionally using isotype controls and internal positive and negative controls.

- Tick this box to confirm that a figure exemplifying the gating strategy is provided in the Supplementary Information.
